# Supplementary material for: Mutation Rate and Spectrum of the Silkworm in Normal and Temperature Stress Conditions
Source: MDPI journal article supplement (doi:10.3390/genes14030649), 2023-03-04
Supplement: s1 [file s1]

**Supplementary table S1.** Sequencing depth and coverage of all samples

| <b>Normal conditions</b> |                 |                     |                         |                             |
|--------------------------|-----------------|---------------------|-------------------------|-----------------------------|
| <b>Samples</b>           | <b>No.reads</b> | <b>Mapped reads</b> | <b>Mean coverage(X)</b> | <b>Mean Mapping Quality</b> |
| NC-Paternal              | 102,334,097     | 99.73%              | 32.9723                 | 21.48                       |
| NC-Maternal              | 106,476,407     | 99.75%              | 34.2729                 | 21.3                        |
| NC-offspring-1           | 113,240,333     | 99.81%              | 36.5216                 | 21.52                       |
| NC-offspring-2           | 157,090,378     | 99.81%              | 50.654                  | 21.49                       |
| NC-offspring-3           | 117,020,978     | 99.77%              | 37.6965                 | 21.48                       |
| NC-offspring-4           | 121,410,039     | 99.81%              | 39.1693                 | 21.57                       |
| NC-offspring-5           | 130,213,361     | 99.82%              | 41.9743                 | 21.53                       |
| NC-offspring-6           | 135,843,883     | 99.80%              | 43.8225                 | 21.57                       |
| NC-offspring-7           | 124,705,370     | 99.74%              | 40.1756                 | 21.53                       |
| NC-offspring-8           | 97,341,821      | 99.82%              | 31.4037                 | 21.58                       |
| NC-offspring-9           | 133,625,850     | 99.82%              | 43.0968                 | 21.55                       |
| NC-offspring-10          | 102,744,542     | 99.73%              | 33.1089                 | 21.58                       |
| NC-offspring-11          | 141,964,996     | 99.73%              | 45.7257                 | 21.58                       |
| NC-offspring-12          | 118,854,098     | 99.79%              | 38.3124                 | 21.52                       |
| NC-offspring-13          | 95,602,982      | 99.59%              | 30.6295                 | 21.47                       |
| NC-offspring-14          | 138,901,831     | 99.82%              | 44.809                  | 21.54                       |
| NC-offspring-15          | 115,422,424     | 99.77%              | 37.1748                 | 21.52                       |
| NC-offspring-16          | 121,143,511     | 99.74%              | 38.9763                 | 21.3                        |
| NC-offspring-17          | 110,462,424     | 99.79%              | 35.5785                 | 21.3                        |
| NC-offspring-18          | 129,239,764     | 99.77%              | 41.6265                 | 21.33                       |
| NC-offspring-19          | 130,208,024     | 99.73%              | 41.9198                 | 21.31                       |
| NC-offspring-20          | 118,664,268     | 99.75%              | 38.1988                 | 21.27                       |
| NC-offspring-21          | 134,638,604     | 99.51%              | 43.3233                 | 21.25                       |
| NC-offspring-22          | 116,424,472     | 99.75%              | 37.5395                 | 21.27                       |
| NC-offspring-23          | 143,429,685     | 99.76%              | 46.1688                 | 21.25                       |
| NC-offspring-24          | 116,051,579     | 99.75%              | 37.368                  | 21.25                       |
| NC-offspring-25          | 103,932,734     | 99.76%              | 33.5194                 | 21.24                       |
| NC-offspring-26          | 128,354,485     | 99.73%              | 41.3713                 | 21.26                       |
| NC-offspring-27          | 135,234,628     | 99.75%              | 43.5493                 | 21.27                       |
| NC-offspring-28          | 136,149,869     | 99.74%              | 43.872                  | 21.31                       |
| NC-offspring-29          | 113,064,167     | 99.78%              | 36.4006                 | 21.26                       |
| NC-offspring-30          | 133,326,762     | 99.78%              | 42.9638                 | 21.35                       |

| <b>Low temperature</b> |                 |                     |                         |                             |
|------------------------|-----------------|---------------------|-------------------------|-----------------------------|
| <b>Samples</b>         | <b>No.reads</b> | <b>Mapped reads</b> | <b>Mean coverage(X)</b> | <b>Mean Mapping Quality</b> |
| LT-Maternal            | 102,904,534     | 99.78%              | 33.2178                 | 21.12                       |
| LT-Paternal            | 104,289,419     | 99.83%              | 33.7196                 | 21.14                       |
| LT-offspring-1         | 83,989,840      | 99.81%              | 27.1266                 | 21.14                       |
| LT-offspring-2         | 75,002,344      | 99.73%              | 24.1939                 | 21.03                       |
| LT-offspring-3         | 83,596,507      | 99.76%              | 26.9958                 | 20.72                       |
| LT-offspring-4         | 78,746,188      | 99.76%              | 25.4143                 | 21.06                       |
| LT-offspring-5         | 92,966,203      | 99.84%              | 30.0389                 | 20.94                       |
| LT-offspring-6         | 69,939,577      | 99.49%              | 22.5362                 | 21.35                       |
| LT-offspring-7         | 87,804,757      | 99.86%              | 28.404                  | 21.21                       |
| LT-offspring-8         | 78,887,093      | 99.86%              | 25.5083                 | 21.32                       |
| LT-offspring-9         | 81,070,607      | 99.83%              | 26.2112                 | 21.42                       |
| LT-offspring-10        | 73,645,332      | 99.80%              | 23.784                  | 21.24                       |

| <b>High temperature</b> |                 |                     |                         |                             |
|-------------------------|-----------------|---------------------|-------------------------|-----------------------------|
| <b>Samples</b>          | <b>No.reads</b> | <b>Mapped reads</b> | <b>Mean coverage(X)</b> | <b>Mean Mapping Quality</b> |
| HT-Maternal             | 94,687,253      | 99.79%              | 30.5639                 | 21.02                       |
| HT-Paternal             | 108,112,620     | 99.73%              | 34.8955                 | 21.27                       |
| HT-offspring-1          | 83,005,550      | 99.79%              | 26.8074                 | 21                          |
| HT-offspring-2          | 84,024,521      | 99.82%              | 27.1427                 | 20.84                       |
| HT-offspring-3          | 76,748,540      | 99.81%              | 24.7832                 | 20.93                       |
| HT-offspring-4          | 77,410,675      | 99.84%              | 25.0004                 | 21.03                       |
| HT-offspring-5          | 70,368,965      | 99.83%              | 22.737                  | 20.8                        |
| HT-offspring-6          | 81,034,084      | 99.85%              | 26.183                  | 21.28                       |
| HT-offspring-7          | 72,583,253      | 99.83%              | 23.443                  | 21.24                       |
| HT-offspring-8          | 84,178,201      | 99.80%              | 27.1971                 | 21.45                       |
| HT-offspring-9          | 85,732,489      | 99.84%              | 27.7105                 | 21.26                       |
| HT-offspring-10         | 82,210,107      | 99.81%              | 26.5712                 | 21.21                       |

Supplementary table S2. The information of all *de novo* mutations.

| Normal conditions |                 |              |          |     |     |            |           |           |                        |            |     |            |                            |                         |
|-------------------|-----------------|--------------|----------|-----|-----|------------|-----------|-----------|------------------------|------------|-----|------------|----------------------------|-------------------------|
| Variant Number    | Samples         | Chromosome   | Position | Ref | Alt | Read depth | Ref reads | Alt reads | Proportion of Alt read | Region     | TE  | Validation | Forward primer             | Reverse primer          |
| NC1               | NC-offspring-9  | Bomo Chr23   | 3722500  | T   | G   | 30         | 21        | 9         | 0.30                   | intergenic | OUT | F          | CAGTTTTCCGGTGTGGTCCCT      | GCATACAAAACCCGACAGC     |
| NC2               | NC-offspring-13 | Bomo Chr17   | 13472593 | A   | G   | 36         | 25        | 11        | 0.31                   | intergenic | OUT | T          | CCGGTACTCGAGACAGCATT       | GTGGTTGTACCTACCCGTGC    |
| NC3               | NC-offspring-13 | Bomo Chr21   | 14309584 | G   | A   | 26         | 18        | 8         | 0.31                   | intergenic | OUT | T          | TCGTTGCCGGGTCTAAAGTC       | CAACAGCATTACGTTGCGA     |
| NC4               | NC-offspring-6  | Bomo Chr22   | 17131823 | T   | C   | 29         | 20        | 9         | 0.31                   | intergenic | OUT | T          | GCCTCCGTCCTGAGAAGAAC       | CTCCCCGATTACGATCAGC     |
| NC5               | NC-offspring-20 | Bomo Chr28   | 10516179 | A   | T   | 32         | 22        | 10        | 0.31                   | intergenic | IN  | T          | CGTCCCCTCCTCTAATGCC        | CTTTTTGGCGGAACACGAG     |
| NC6               | NC-offspring-7  | Bomo Chr13   | 2692518  | G   | A   | 35         | 24        | 11        | 0.31                   | intergenic | OUT | T          | CCACATCGGAGCTAACTGCT       | AAGTGCACACGTCTTTGGA     |
| NC7               | NC-offspring-9  | Bomo Chr11   | 14924852 | T   | A   | 38         | 26        | 12        | 0.32                   | intergenic | IN  | T          | GACGCTTTTTACCGGTGTGG       | CGCGAAATGTACCCAGCTA     |
| NC8               | NC-offspring-27 | Bomo Chr19   | 3738838  | A   | C   | 38         | 26        | 12        | 0.32                   | intergenic | IN  | F          | CAGCTTATCCTCGACTGCGT       | AGCGGTTAGTGGCCTCAAT     |
| NC9               | NC-offspring-13 | Bomo Chr4    | 17341932 | A   | G   | 25         | 17        | 8         | 0.32                   | intron     | OUT | T          | GGCTCGCTGACCAAAGTAGT       | CATAGCCCGTTAGATGGCGT    |
| NC10              | NC-offspring-13 | Bomo Chr15   | 8809936  | G   | A   | 24         | 16        | 8         | 0.33                   | intergenic | OUT | T          | AGTTACGGCAAAAGTGTGGCT      | ACAGTTGACAGATGACGGCTT   |
| NC11              | NC-offspring-24 | Bomo Chr13   | 12343252 | A   | T   | 33         | 22        | 11        | 0.33                   | intergenic | OUT | T          | CGGGCAACTAACTGTCAGGA       | TGACACGACGACTGCGTTTAT   |
| NC12              | NC-offspring-21 | Bomo Chr10   | 13566275 | A   | T   | 45         | 30        | 15        | 0.33                   | intergenic | OUT | T          | GACTGTCCGTTGTTTTGCC        | CCTACCGGTTTTTGCTCCT     |
| NC13              | NC-offspring-23 | Bomo Chr17   | 10023    | A   | G   | 39         | 26        | 13        | 0.33                   | intergenic | OUT | F          | TCTCGCAGAGTAGAGCACCT       | TTTCCACGTCTCGATGGTG     |
| NC14              | NC-offspring-15 | Bomo Chr24   | 16497379 | T   | G   | 44         | 29        | 15        | 0.34                   | intron     | IN  | T          | GCCAAGGGGGAGATTTGGAA       | TCGTAGGCTCGAAGGGGAG     |
| NC15              | NC-offspring-18 | Bomo Chr19   | 6823092  | C   | G   | 35         | 23        | 12        | 0.34                   | intergenic | OUT | T          | TGTTGCTCGTGAACCGTCTT       | TAGGTGCTCGTGGCATAG      |
| NC16              | NC-offspring-12 | Bomo Chr10   | 11685117 | T   | A   | 32         | 21        | 11        | 0.34                   | intergenic | OUT | T          | GTCAAAGCGATCCGAGGCTA       | TACATCGCCAACGGAACGAA    |
| NC17              | NC-offspring-24 | Bomo Chr5    | 4669486  | G   | A   | 26         | 17        | 9         | 0.35                   | intergenic | OUT | T          | GCGAGGGTTGAACGAAACTG       | TGAACCGCTAATCTCAGGA     |
| NC18              | NC-offspring-16 | Bomo Scaf010 | 93298    | A   | G   | 28         | 18        | 10        | 0.36                   | intergenic | IN  | T          | CGGGGCTAAGCGACAATAAC       | CGGCCTTACTCTCAAAGGGT    |
| NC19              | NC-offspring-29 | Bomo Chr10   | 10772046 | C   | A   | 53         | 34        | 19        | 0.36                   | intron     | OUT | T          | TCTGTGGGTCCAGTAACCA        | AGTACCGCGAAAGGAAGTC     |
| NC20              | NC-offspring-13 | Bomo Chr7    | 12904904 | C   | T   | 25         | 16        | 9         | 0.36                   | exon       | OUT | T          | TTGCGCTACTGGTGGTAGGA       | GCACGATGTACACGAAGG      |
| NC21              | NC-offspring-22 | Bomo Chr5    | 7531454  | T   | C   | 36         | 23        | 13        | 0.36                   | intron     | OUT | T          | TTGGGGCTCAACACTTTTCTCT     | CGTACAGCGGCTTTGTTTCT    |
| NC22              | NC-offspring-30 | Bomo Chr12   | 6965686  | C   | G   | 30         | 19        | 11        | 0.37                   | intron     | OUT | T          | AAGCGTACTGAAGGCCCAAA       | GGCCTGGACACGCTTTAGTA    |
| NC23              | NC-offspring-28 | Bomo Chr7    | 1064237  | C   | A   | 43         | 27        | 16        | 0.37                   | exon       | OUT | T          | GCACGATGATGTAGTCCCA        | GCACGATAGGTACACCAACC    |
| NC24              | NC-offspring-23 | Bomo Chr14   | 2192356  | C   | T   | 42         | 26        | 16        | 0.38                   | intron     | OUT | F          | GGGGATCGTTTGTAGTGGTG       | TCGCATGGATCGTCTGGAAG    |
| NC25              | NC-offspring-19 | Bomo Chr17   | 2432066  | G   | A   | 39         | 24        | 15        | 0.38                   | intergenic | OUT | T          | TGGCGGAAGTGGACTTATGG       | TTAGTACCTCGAAGGGCTG     |
| NC26              | NC-offspring-14 | Bomo Chr6    | 16129500 | A   | T   | 39         | 24        | 15        | 0.38                   | intergenic | OUT | T          | TTTACGACAACCACGGGGAG       | TGACCACATCTCGGCTTC      |
| NC27              | NC-offspring-27 | Bomo Chr12   | 16426416 | A   | G   | 36         | 22        | 14        | 0.39                   | intergenic | OUT | T          | GAGAGACCGGAAACATGGCA       | CGCTAAACCTCGAGAACGGC    |
| NC28              | NC-offspring-8  | Bomo Chr13   | 14215074 | C   | A   | 33         | 20        | 13        | 0.39                   | intergenic | OUT | T          | GGAGCGTAGGCTGGAATCTT       | GAGAGCCGCAACATACGAGA    |
| NC29              | NC-offspring-24 | Bomo Chr10   | 4254666  | C   | A   | 30         | 18        | 12        | 0.40                   | intron     | OUT | T          | CGAAAAACAGCATTCGGGCT       | TCGTAGGCGTCATAAGGCAC    |
| NC30              | NC-offspring-14 | Bomo Chr6    | 13935671 | G   | A   | 45         | 27        | 18        | 0.40                   | intron     | OUT | T          | CCACCTTCAAAACCGAAACG       | TGACGGAGCTATCCTCGTGT    |
| NC31              | NC-offspring-11 | Bomo Chr19   | 6370594  | C   | A   | 32         | 19        | 13        | 0.41                   | intergenic | OUT | T          | TCGTAGCACTTTTGGCGGAGT      | CGACAAGGGTGGTGTGATGGA   |
| NC32              | NC-offspring-17 | Bomo Chr7    | 11757413 | C   | T   | 32         | 19        | 13        | 0.41                   | intergenic | OUT | T          | GTCTAAGAAACCCAGCCCAAC      | CAAGCAATGCCTGCACCAAT    |
| NC33              | NC-offspring-29 | Bomo Chr4    | 5281848  | C   | T   | 27         | 16        | 11        | 0.41                   | intergenic | OUT | T          | CCGTAACAGAGTTGTCTCCA       | CGAGTACGACCACTCAAC      |
| NC34              | NC-offspring-6  | Bomo Chr11   | 15169940 | A   | C   | 38         | 22        | 16        | 0.42                   | exon       | OUT | T          | CTTTGTCTGGGCGTGTTCG        | GGGGACTTATAGCCGGGAGA    |
| NC35              | NC-offspring-21 | Bomo Chr16   | 13183326 | C   | A   | 26         | 15        | 11        | 0.42                   | intron     | OUT | T          | GCGGTATGATGGCCCTGTAA       | AGCTGTTTCCATCTCGTCCG    |
| NC36              | NC-offspring-14 | Bomo Chr3    | 6656473  | G   | C   | 33         | 19        | 14        | 0.42                   | intergenic | IN  | T          | GACTTGGCTACGCTCCTTCT       | AATTCAACCCACTGCCGTGA    |
| NC37              | NC-offspring-18 | Bomo Chr1    | 4351349  | A   | T   | 14         | 8         | 6         | 0.43                   | intron     | OUT | F          | AAACCGTCGTTAAAGGCCCA       | CTGCAAAAGAGTTCGACGTGC   |
| NC38              | NC-offspring-30 | Bomo Chr13   | 11037414 | C   | T   | 37         | 21        | 16        | 0.43                   | intergenic | OUT | T          | CCGATAAGCCTCCTTCGCAA       | CGGCTTTGTACGCAAACTG     |
| NC39              | NC-offspring-12 | Bomo Chr13   | 5314947  | T   | A   | 34         | 19        | 15        | 0.44                   | intron     | OUT | T          | TGGACACGGCTAGCTTAACG       | CGCACAGACGATAATTGCGG    |
| NC40              | NC-offspring-1  | Bomo Chr8    | 3492258  | G   | A   | 36         | 20        | 16        | 0.44                   | intergenic | OUT | T          | GTCCAAAGAAAGGTTGAGGGTA     | AGTAATGCTTCGCAGAACTGA   |
| NC41              | NC-offspring-29 | Bomo Chr3    | 4134264  | T   | C   | 42         | 23        | 19        | 0.45                   | exon       | OUT | T          | TATTGGGCTTTGCTGAACCT       | ATTGAGCGTGGCTTCATTTCT   |
| NC42              | NC-offspring-28 | Bomo Chr6    | 4515432  | A   | T   | 50         | 27        | 23        | 0.46                   | intron     | OUT | T          | GACGTGTTAGGCTGGTCTCT       | TCAGGTAATTACGGTGGGGCG   |
| NC43              | NC-offspring-17 | Bomo Chr24   | 5135557  | A   | T   | 26         | 14        | 12        | 0.46                   | intergenic | OUT | T          | ATTTGGTAGTGCTGTGGCTTAGA    | GCTTCATCAGGACAGGTGGG    |
| NC44              | NC-offspring-15 | Bomo Chr1    | 6410731  | T   | A   | 30         | 16        | 14        | 0.47                   | intron     | OUT | T          | TCGCTAACCGAGCACTAAGACC     | CAGAGACTGATCTCGCTCGC    |
| NC45              | NC-offspring-13 | Bomo Chr3    | 7194205  | C   | T   | 30         | 16        | 14        | 0.47                   | exon       | OUT | T          | CGTACACCACGACCATAGG        | CTAAGACGGCGCTTCAATCA    |
| NC46              | NC-offspring-21 | Bomo Chr8    | 14707532 | T   | A   | 47         | 25        | 22        | 0.47                   | intron     | OUT | T          | CCTAATATCGTACAAGAGCCTTCATC | ACAGGTGACCGCTTACACGAT   |
| NC47              | NC-offspring-9  | Bomo Chr10   | 10266170 | T   | A   | 32         | 17        | 15        | 0.47                   | intergenic | IN  | T          | ACATTCGGACCACAAGGAGAC      | CGATCGAGTCCGCTTCTAC     |
| NC48              | NC-offspring-12 | Bomo Chr26   | 2681149  | G   | A   | 49         | 26        | 23        | 0.47                   | intergenic | OUT | T          | GCCAGCAGCACTTACTAACTACCT   | GAATGCCGTACGCCACCTC     |
| NC49              | NC-offspring-18 | Bomo Chr21   | 1687204  | C   | T   | 36         | 19        | 17        | 0.47                   | intron     | OUT | T          | GGGGCATCTTCCGATACGTT       | TTTCCGATCGCTACCATCG     |
| NC50              | NC-offspring-18 | Bomo Chr13   | 9471056  | T   | C   | 40         | 21        | 19        | 0.48                   | intergenic | OUT | T          | AACTCATTCGTCTGCGACT        | TTTAAGGCTCACACCGGACG    |
| NC51              | NC-offspring-27 | Bomo Chr16   | 11790607 | A   | G   | 40         | 21        | 19        | 0.48                   | intergenic | OUT | T          | CCACTACTGTTAGGTACGCGG      | TCTGGACCGACTCTCAAAGA    |
| NC52              | NC-offspring-19 | Bomo Chr20   | 854321   | C   | T   | 44         | 23        | 21        | 0.48                   | intergenic | OUT | T          | GACGCCCAAGAAATAGGCAGA      | CACCGTTAGTGGATCGAGGG    |
| NC53              | NC-offspring-18 | Bomo Chr8    | 15166412 | G   | A   | 25         | 13        | 12        | 0.48                   | intergenic | OUT | T          | TTTGGACACTGGAATCGGCA       | CAGTGCTCCATGACTTGGCT    |
| NC54              | NC-offspring-4  | Bomo Chr11   | 3984547  | T   | C   | 27         | 14        | 13        | 0.48                   | intergenic | IN  | T          | ATAGTGTGCTGGTTGCGACA       | GCCGGTGCATTGTTATCGAC    |
| NC55              | NC-offspring-12 | Bomo Chr1    | 12012967 | T   | C   | 29         | 15        | 14        | 0.48                   | intergenic | OUT | T          | TCGCAATGGAGACCAGAACA       | GTGGGTTTACAGAACGAATGC   |
| NC56              | NC-offspring-1  | Bomo Scaf001 | 260233   | T   | A   | 31         | 16        | 15        | 0.48                   | intron     | OUT | T          | TTCCCGATGGTGATTGGACA       | GAGACGGCAACACACGAAAC    |
| NC57              | NC-offspring-16 | Bomo Chr10   | 8935930  | A   | G   | 39         | 20        | 19        | 0.49                   | intron     | OUT | T          | AAGACTAAGGCAATAGACCCACT    | ATGTAGCAACCATAGATCCCAAT |
| NC58              | NC-offspring-4  | Bomo Chr17   | 2768643  | T   | C   | 43         | 22        | 21        | 0.49                   | intergenic | OUT | T          | CAGATCCAGACCATGCACCT       | AAGTACGATACGACCCGTGC    |
| NC59              | NC-offspring-19 | Bomo Chr2    | 885244   | G   | A   | 34         | 17        | 17        | 0.50                   | intergenic | OUT | T          | ATTATCATAGGCGCGTCCCC       | GCCTGTATGACCAAGGAAGGG   |
| NC60              | NC-offspring-1  | Bomo Chr7    | 12194406 | T   | C   | 30         | 15        | 15        | 0.50                   | intergenic | OUT | T          | TCTGCGCTCTACGATTACG        | CGAGTCTTCGCCGACCATAA    |
| NC61              | NC-offspring-4  | Bomo Chr25   | 12651239 | G   | A   | 38         | 19        | 19        | 0.50                   | intergenic | IN  | T          | GCGCTTATCATGCAAGAGATGG     | CGAGGCAGTGGAGGAAAGT     |
| NC62              | NC-offspring-4  | Bomo Chr21   | 6637923  | C   | A   | 36         | 18        | 18        | 0.50                   | intergenic | IN  | T          | AAACTCGGTACGAAACGGGC       | GATTTCGCCGCGCTGACTATAA  |

Supplementary table S2 continue

|       |                 |            |          |   |   |    |    |    |      |            |     |         |                          |                           |
|-------|-----------------|------------|----------|---|---|----|----|----|------|------------|-----|---------|--------------------------|---------------------------|
| NC63  | NC-offspring-10 | Bomo Chr20 | 2502150  | T | C | 26 | 13 | 13 | 0.50 | intron     | OUT | T       | GTTCTTCTCGTTGAGCCAGTT    | GTAATAAGCGGTGCGTATCCC     |
| NC64  | NC-offspring-30 | Bomo Chr14 | 2282655  | G | C | 35 | 17 | 18 | 0.51 | intron     | OUT | T       | TGCCTCTTGTGTCGGAATGT     | TTTGCGGAGACTCACGGTTA      |
| NC65  | NC-offspring-23 | Bomo Chr8  | 15724617 | T | C | 31 | 15 | 16 | 0.52 | intron     | OUT | T       | CTTTTCGTGCGCCGATCAAC     | ATAGACACACACAGCGAGCC      |
| NC66  | NC-offspring-13 | Bomo Chr28 | 3227528  | T | C | 25 | 12 | 13 | 0.52 | intron     | OUT | T       | GAACACGTTCCGTCCAGTGT     | ATCAAAGCCGGCAATGTGAC      |
| NC67  | NC-offspring-28 | Bomo Chr2  | 791699   | A | G | 38 | 18 | 20 | 0.53 | intergenic | IN  | T       | CGTTGCGTTTTTCGAGTCAGC    | TTGGCGGTTTTTGAATGAGC      |
| NC68  | NC-offspring-2  | Bomo Chr12 | 8870076  | C | T | 38 | 18 | 20 | 0.53 | intergenic | IN  | T       | GTACTAGTGCACGCGACTT      | ACATCAGCCGGACGCAATAC      |
| NC69  | NC-offspring-11 | Bomo Chr12 | 4561504  | G | A | 26 | 12 | 14 | 0.54 | intergenic | OUT | T       | TATGCGTGCATGCGACATTG     | AGCTTCGTCCATCTAAGCCG      |
| NC70  | NC-offspring-2  | Bomo Chr21 | 3259305  | C | T | 73 | 33 | 40 | 0.55 | intergenic | OUT | T       | AGTAGGATTCGCGCTATTATCGTA | TCTACTGGTGATAGGACCTGTTGT  |
| NC71  | NC-offspring-8  | Bomo Chr18 | 7981971  | G | A | 18 | 8  | 10 | 0.56 | intergenic | IN  | T       | CGCCTCGTTGATAGTGGTTTG    | AACTCGTATGACTGTTTCGCCTC   |
| NC72  | NC-offspring-4  | Bomo Chr25 | 1203868  | G | A | 39 | 17 | 22 | 0.56 | intergenic | OUT | T       | GCTATGCCAGGTTTACCAAGT    | AGCTTCCCACTTCGCATTCT      |
| NC73  | NC-offspring-22 | Bomo Chr17 | 7615541  | A | T | 30 | 13 | 17 | 0.57 | intron     | OUT | T       | AGTGTGACTGAAATGCCCTACCG  | GGTGTGAGGAAGGGAAGGAGA     |
| NC74  | NC-offspring-1  | Bomo Chr23 | 3610379  | C | A | 27 | 11 | 16 | 0.59 | intergenic | OUT | T       | CTATTCTCGGCTGCGTGGAT     | CCGGAACATCAAGAGCACCT      |
| NC75  | NC-offspring-16 | Bomo Chr24 | 6121645  | A | T | 30 | 12 | 18 | 0.60 | intergenic | OUT | T       | AGTACCCGGATTTCGAAGCG     | CCGTGTGTCTCACCAAATG       |
| NC76  | NC-offspring-14 | Bomo Chr9  | 14438522 | T | A | 48 | 19 | 29 | 0.60 | intron     | IN  | T       | CGTAGATGATACACGCAAGGC    | TCTAGCCGAATTAAGTCTAAAGGA  |
| NC77  | NC-offspring-3  | Bomo Chr7  | 12422408 | T | A | 32 | 12 | 20 | 0.63 | intron     | OUT | T       | ATTGGGACCACAAATAGAGCG    | CGAATACGAATCGGTAATAAGACA  |
| NC78  | NC-offspring-15 | Bomo Chr18 | 13580932 | G | A | 34 | 12 | 22 | 0.65 | intergenic | OUT | T       | CGGCTGTACAGATACAAGTCC    | TGGCCGAGCAGGCGAGC         |
| NC79  | NC-offspring-27 | Bomo Chr4  | 7639783  | C | T | 40 | 14 | 26 | 0.65 | intron     | OUT | T       | TCGTTAGTCCGCTACTGTCAT    | AAAGTAGCCCTAGCTGCACC      |
| NC80  | NC-offspring-10 | Bomo Chr3  | 4906455  | T | A | 26 | 9  | 17 | 0.65 | intergenic | OUT | T       | TGAATCAGCGCGGACCGAAA     | GGAATTAGAGCACCACAACGG     |
| NC81  | NC-offspring-2  | Bomo Chr27 | 7801770  | A | C | 38 | 13 | 25 | 0.66 | intergenic | OUT | T       | GGGCTGTGTATGTGGGCTAA     | TACCCTCTCGGTTGAGTCC       |
| NC82  | NC-offspring-19 | Bomo Chr1  | 16978349 | T | A | 21 | 7  | 14 | 0.67 | intergenic | OUT | T       | TGCGTGCCTAGATACCTGATTC   | ACTATACTGCCAATCGTGAACCTGT |
| NC83  | NC-offspring-3  | Bomo Chr4  | 10820685 | C | T | 38 | 11 | 27 | 0.71 | intron     | OUT | T       | TTAAGCTGATTGGCCGCGA      | GATCGTTCTCAATTGCGTGCC     |
| NC84  | NC-offspring-13 | Bomo Chr3  | 9909934  | A | T | 22 | 6  | 16 | 0.73 | intron     | OUT | T       | ATCACTTTGAGAAGGCGGCA     | ACGAGCCGGTCCCTAGTAAT      |
| NC85  | NC-offspring-11 | Bomo Chr12 | 16123796 | G | A | 45 | 27 | 18 | 0.40 | intergenic | IN  | no band | GTACCACCGCCTTGCCCTATT    | GCCTCGTATTCTCAGTGCCT      |
| NC86  | NC-offspring-18 | Bomo Chr23 | 1606236  | A | G | 42 | 24 | 18 | 0.43 | intergenic | OUT | no band | CTGTCGTGTTGTGTTTCGGG     | CCTTCTCAGTGAGTCGCGTT      |
| NC87  | NC-offspring-10 | Bomo Chr9  | 15515750 | C | A | 22 | 12 | 10 | 0.45 | intron     | OUT | no band | AGCTCAGTAGCACCACGAAG     | AGCTCAGTAGCACCACGAAG      |
| NC88  | NC-offspring-26 | Bomo Chr5  | 16064276 | T | A | 51 | 26 | 25 | 0.49 | intergenic | OUT | no band | CTTTCCACGCATGTGGGTTT     | GCCTCCAAGGAGACCTTAAC      |
| NC89  | NC-offspring-26 | Bomo Chr3  | 7669184  | G | A | 33 | 16 | 17 | 0.52 | intron     | OUT | no band | TTCTTGAGTCTGCACGGG       | TTTCACTCTCCGTCGCGC        |
| NC90  | NC-offspring-1  | Bomo Chr15 | 14236033 | T | C | 19 | 9  | 10 | 0.53 | intron     | IN  | no band | TGCTTCGGACGCTTATCCG      | AAGATTGAACCGTCGCGCT       |
| NC91  | NC-offspring-8  | Bomo Chr17 | 2179918  | A | G | 34 | 16 | 18 | 0.53 | intron     | OUT | no band | TGACTATTGCGCTGAGGGTC     | ACGGCCACCTGATGTTAAG       |
| NC92  | NC-offspring-2  | Bomo Chr2  | 5285664  | A | T | 32 | 15 | 17 | 0.53 | intergenic | IN  | no band | TTGGGTGGGTGAGAAAGACG     | AAGCAGCGAGCGAAGAAAC       |
| NC93  | NC-offspring-15 | Bomo Chr17 | 287866   | T | G | 15 | 7  | 8  | 0.53 | exon       | IN  | no band | GTACCTCGGCCTCATTCTGG     | GGGGGACCCGAAACCTTAG       |
| NC94  | NC-offspring-25 | Bomo Chr21 | 14217853 | T | C | 30 | 14 | 16 | 0.53 | intergenic | OUT | no band | CCTCTGGTAGCCAATTAACACC   | ACCGTGCTCCCTTCACTCTA      |
| NC95  | NC-offspring-17 | Bomo Chr8  | 14489965 | A | G | 27 | 12 | 15 | 0.56 | intron     | OUT | no band | TGACCTCTTTGCCAGCAAT      | CTACCATCAGGGCGTAGCTG      |
| NC96  | NC-offspring-11 | Bomo Chr8  | 10770419 | G | A | 39 | 17 | 22 | 0.56 | exon       | OUT | no band | GACCCCTTGTGTAGTGACC      | TGATGGGTGCGACACTCCTA      |
| NC97  | NC-offspring-11 | Bomo Chr1  | 229385   | A | C | 44 | 19 | 25 | 0.57 | intron     | OUT | no band | GCAAGCGTCACTTTGGGAGC     | GATGGGTGCGACACTCTAC       |
| NC98  | NC-offspring-10 | Bomo Chr20 | 10039975 | T | A | 21 | 9  | 12 | 0.57 | intergenic | OUT | no band | AGGGCTCTCGAAATGTGGTG     | CCGCGTGAAGCTGAAATAGC      |
| NC99  | NC-offspring-21 | Bomo Chr21 | 4597013  | G | T | 33 | 14 | 19 | 0.58 | intergenic | OUT | no band | CCACAAAGAGGCAACGCAAA     | GCAACAGCTAGAGCCAAGA       |
| NC100 | NC-offspring-23 | Bomo Chr1  | 5641333  | G | A | 17 | 7  | 10 | 0.59 | intron     | OUT | no band | GTGTGCGTCAAATGCATGGT     | GATGACGACGGGTCCGCTAT      |
| NC101 | NC-offspring-2  | Bomo Chr4  | 16350687 | C | T | 34 | 14 | 20 | 0.59 | intergenic | IN  | no band | CAATCTTGCTGTTTCCGCCG     | GACCTTACCTCGCTGGTGAC      |
| NC102 | NC-offspring-18 | Bomo Chr16 | 144208   | T | C | 37 | 15 | 22 | 0.59 | intergenic | OUT | no band | CGACAAAGTCTGGCACAACG     | GCGGCAACCTAAGGCGGATT      |
| NC103 | NC-offspring-4  | Bomo Chr5  | 16878039 | G | A | 38 | 14 | 24 | 0.63 | intergenic | IN  | no band | GCAATCACAGCGATTGCGTT     | TAGGTGGTATACGCGTTGCG      |
| NC104 | NC-offspring-23 | Bomo Chr24 | 10406786 | T | C | 42 | 15 | 27 | 0.64 | intergenic | IN  | no band | GAATCGAACCCACGACCCTC     | GCGAGCTGTTCACCACTTT       |
| NC105 | NC-offspring-21 | Bomo Chr9  | 4004163  | T | C | 27 | 7  | 20 | 0.74 | intergenic | OUT | no band | TGGTGGTCGAGCATTTGTT      | TGGCCTTAGGTTTCGGCT        |
| NC106 | NC-offspring-23 | Bomo Chr2  | 7047647  | C | T | 30 | 14 | 16 | 0.53 | intron     | OUT | \       | \                        | \                         |

## High temperature

| Variant Number | Sample          | Chromosome | Position | Ref | Alt | Read depth | Ref reads | Alt reads | Proportion of Alt read | Region     |     | Validation | Forward primer        | Reverse primer        |
|----------------|-----------------|------------|----------|-----|-----|------------|-----------|-----------|------------------------|------------|-----|------------|-----------------------|-----------------------|
| HT1            | HT-offspring-6  | Bomo Chr22 | 12045005 | C   | G   | 23         | 12        | 11        | 0.48                   | intergenic | OUT | T          | GGTGGGATTCCAGTGTGGT   | TATTCGTAGCGACACCTGCC  |
| HT2            | HT-offspring-8  | Bomo Chr23 | 3704124  | G   | A   | 33         | 15        | 18        | 0.55                   | intergenic | OUT | T          | AGAGCAGGAGCTAGGTGTCT  | AACGGCTGATGGGGCTAAAA  |
| HT3            | HT-offspring-10 | Bomo Chr23 | 19858453 | G   | T   | 29         | 18        | 11        | 0.38                   | intergenic | OUT | T          | TGAGGATACGGGCCACCTAA  | TTCGAACCCCATCACAGTCG  |
| HT4            | HT-offspring-10 | Bomo Chr24 | 1666203  | T   | C   | 18         | 11        | 7         | 0.39                   | intergenic | OUT | T          | TCCTTCGTTTTCACTAGGCC  | ATGCGCTACACGGATCAAGT  |
| HT5            | HT-offspring-10 | Bomo Chr26 | 6715071  | G   | C   | 29         | 11        | 18        | 0.62                   | intergenic | OUT | T          | AAAACCCCGAGATGGGTGAC  | GGCGCAATGTGGTTCTTT    |
| HT6            | HT-offspring-6  | Bomo Chr27 | 10613054 | T   | G   | 17         | 5         | 12        | 0.71                   | intergenic | OUT | T          | GAATGCTTTTTGGTCGGCG   | TTGTTTGGTCTCGCTGCG    |
| HT7            | HT-offspring-3  | Bomo Chr28 | 3126377  | A   | G   | 30         | 17        | 13        | 0.43                   | intergenic | IN  | T          | TAGACGAGCGGATCACACG   | CGGTCAATGTCTGTGCGCT   |
| HT8            | HT-offspring-1  | Bomo Chr4  | 7150454  | C   | G   | 11         | 6         | 5         | 0.45                   | intron     | IN  | T          | ACACCCCTTTTTACCCGTGGT | GTTACAGCGGATCAGTGGCT  |
| HT9            | HT-offspring-8  | Bomo Chr5  | 3600521  | C   | A   | 23         | 10        | 13        | 0.57                   | intergenic | OUT | T          | GTGGCGTTGAAGAGTACCGA  | TGGGTGAGGTGTTATGGGC   |
| HT10           | HT-offspring-10 | Bomo Chr7  | 8771502  | C   | G   | 27         | 17        | 10        | 0.37                   | intergenic | OUT | T          | CCCGCTCGCAATTCATACT   | CCCTTGTGTTAAGCCGTCGC  |
| HT11           | HT-offspring-2  | Bomo Chr7  | 11587262 | C   | T   | 24         | 13        | 11        | 0.46                   | intergenic | IN  | T          | TAAGCATGCAAGACCGACCG  | TGCCACCTCGTATTGCTGT   |
| HT12           | HT-offspring-2  | Bomo Chr9  | 16700363 | G   | A   | 22         | 14        | 8         | 0.36                   | intergenic | OUT | T          | TGGAGGCACATCTAATGCGT  | TAATTGCAGCGTCAAGTGC   |
| HT13           | HT-offspring-8  | Bomo Chr11 | 20196424 | C   | T   | 22         | 12        | 10        | 0.45                   | intergenic | OUT | T          | GTAACACCGCACGTTTACAG  | GAGCCCGAGAAGCTAAGTCC  |
| HT14           | HT-offspring-4  | Bomo Chr12 | 6195345  | C   | T   | 31         | 12        | 19        | 0.61                   | intergenic | OUT | T          | TGCCAATTCGGTGAAGTCA   | GAAAGTTCCTTCGCGCTAT   |
| HT15           | HT-offspring-3  | Bomo Chr16 | 13563717 | A   | T   | 23         | 7         | 16        | 0.70                   | intergenic | OUT | T          | AAGCTGGTCCGACTTCTGTG  | ACTTCTTTGTAGAAGCGCG   |
| HT16           | HT-offspring-3  | Bomo Chr17 | 11294215 | G   | T   | 18         | 6         | 12        | 0.67                   | intergenic | OUT | T          | ATGACTGTGGTCCCGAAAC   | CTTTGTGTGGCCATTGCGA   |
| HT17           | HT-offspring-2  | Bomo Chr18 | 11501635 | C   | T   | 25         | 14        | 11        | 0.44                   | intergenic | OUT | T          | CGACCCGCATTTACTGACGA  | ATTACACTTGTGGGGCTGGA  |
| HT18           | HT-offspring-1  | Bomo Chr20 | 11157672 | G   | A   | 21         | 8         | 13        | 0.62                   | intron     | OUT | T          | GCTCGTCTGCCTACAAGTT   | ATGCGAAGTGATGGAGGCA   |
| HT19           | HT-offspring-3  | Bomo Chr22 | 9566002  | T   | C   | 24         | 12        | 12        | 0.50                   | exon       | OUT | T          | AGTCTTGTTCCGCCCGTTT   | TTGGCAAGTACTCGTGTTCCT |

Supplementary table S2 continue

|      |                 |            |          |   |   |    |    |    |      |            |     |   |                       |                     |
|------|-----------------|------------|----------|---|---|----|----|----|------|------------|-----|---|-----------------------|---------------------|
| HT20 | HT-offspring-7  | Bomo Chr22 | 12838456 | G | A | 18 | 11 | 7  | 0.39 | intergenic | OUT | T | TGGGAAAGTGATACATCGGGC | GTGTTTGAACAGAGCGCGT |
| HT21 | HT-offspring-4  | Bomo Chr22 | 4397406  | C | G | 13 | 7  | 6  | 0.46 | intron     | OUT | \ | \                     | \                   |
| HT22 | HT-offspring-4  | Bomo Chr15 | 15967075 | T | C | 26 | 14 | 12 | 0.46 | intergenic | OUT | \ | \                     | \                   |
| HT23 | HT-offspring-7  | Bomo Chr7  | 8002153  | T | C | 29 | 20 | 9  | 0.31 | intergenic | OUT | \ | \                     | \                   |
| HT24 | HT-offspring-3  | Bomo Chr8  | 15308025 | G | A | 16 | 11 | 5  | 0.31 | intergenic | OUT | \ | \                     | \                   |
| HT25 | HT-offspring-3  | Bomo Chr8  | 13704263 | G | A | 19 | 13 | 6  | 0.32 | intergenic | IN  | \ | \                     | \                   |
| HT26 | HT-offspring-1  | Bomo Chr27 | 9944202  | A | G | 22 | 15 | 7  | 0.32 | intergenic | OUT | \ | \                     | \                   |
| HT27 | HT-offspring-5  | Bomo Chr11 | 18663809 | C | T | 18 | 12 | 6  | 0.33 | intergenic | OUT | \ | \                     | \                   |
| HT28 | HT-offspring-4  | Bomo Chr17 | 13226651 | C | A | 26 | 17 | 9  | 0.35 | exon       | OUT | \ | \                     | \                   |
| HT29 | HT-offspring-3  | Bomo Chr3  | 2850560  | G | T | 23 | 15 | 8  | 0.35 | intergenic | OUT | \ | \                     | \                   |
| HT30 | HT-offspring-8  | Bomo Chr6  | 7705702  | G | A | 14 | 9  | 5  | 0.36 | intron     | OUT | \ | \                     | \                   |
| HT31 | HT-offspring-3  | Bomo Chr9  | 11669641 | C | T | 21 | 13 | 8  | 0.38 | intron     | OUT | \ | \                     | \                   |
| HT32 | HT-offspring-5  | Bomo Chr15 | 11572664 | A | C | 24 | 14 | 10 | 0.42 | intron     | OUT | \ | \                     | \                   |
| HT33 | HT-offspring-10 | Bomo Chr4  | 11652949 | A | T | 24 | 14 | 10 | 0.42 | intergenic | IN  | \ | \                     | \                   |
| HT34 | HT-offspring-6  | Bomo Chr15 | 1468256  | A | C | 21 | 12 | 9  | 0.43 | intron     | OUT | \ | \                     | \                   |
| HT35 | HT-offspring-8  | Bomo Chr18 | 10055768 | T | C | 15 | 8  | 7  | 0.47 | intron     | OUT | \ | \                     | \                   |
| HT36 | HT-offspring-4  | Bomo Chr11 | 13617206 | T | G | 15 | 8  | 7  | 0.47 | intergenic | OUT | \ | \                     | \                   |
| HT37 | HT-offspring-9  | Bomo Chr21 | 12202293 | A | G | 27 | 14 | 13 | 0.48 | intergenic | OUT | \ | \                     | \                   |
| HT38 | HT-offspring-6  | Bomo Chr13 | 1861996  | T | C | 29 | 15 | 14 | 0.48 | intron     | OUT | \ | \                     | \                   |
| HT39 | HT-offspring-2  | Bomo Chr24 | 435531   | A | T | 6  | 3  | 3  | 0.50 | intergenic | OUT | \ | \                     | \                   |
| HT40 | HT-offspring-7  | Bomo Chr10 | 16014341 | A | T | 20 | 10 | 10 | 0.50 | intron     | OUT | \ | \                     | \                   |
| HT41 | HT-offspring-9  | Bomo Chr10 | 11989876 | G | A | 21 | 10 | 11 | 0.52 | intergenic | IN  | \ | \                     | \                   |
| HT42 | HT-offspring-8  | Bomo Chr8  | 14876585 | G | A | 28 | 13 | 15 | 0.54 | intron     | IN  | \ | \                     | \                   |
| HT43 | HT-offspring-3  | Bomo Chr23 | 10585292 | A | G | 18 | 8  | 10 | 0.56 | intron     | OUT | \ | \                     | \                   |
| HT44 | HT-offspring-7  | Bomo Chr24 | 4246628  | C | T | 19 | 8  | 11 | 0.58 | intergenic | OUT | \ | \                     | \                   |
| HT45 | HT-offspring-10 | Bomo Chr13 | 3434412  | G | T | 17 | 7  | 10 | 0.59 | intergenic | OUT | \ | \                     | \                   |
| HT46 | HT-offspring-8  | Bomo Chr1  | 10411614 | G | A | 22 | 8  | 14 | 0.64 | intergenic | IN  | \ | \                     | \                   |
| HT47 | HT-offspring-8  | Bomo Chr20 | 5765713  | A | G | 29 | 10 | 19 | 0.66 | intergenic | OUT | \ | \                     | \                   |
| HT48 | HT-offspring-5  | Bomo Chr10 | 7468077  | A | G | 20 | 3  | 17 | 0.85 | exon       | OUT | \ | \                     | \                   |

## Low temperature

| Variant Number | Sample          | Chromosome | Position | Ref | Alt | Read depth | Ref reads | Alt reads | Proportion of Alt read | Region     |     | Validation | Forward primer       | Reverse primer        |
|----------------|-----------------|------------|----------|-----|-----|------------|-----------|-----------|------------------------|------------|-----|------------|----------------------|-----------------------|
| LT1            | LT-offspring-5  | Bomo Chr25 | 2452472  | A   | C   | 20         | 11        | 9         | 0.45                   | intergenic | OUT | T          | GACGGCGCATGTTTAGTGCA | GTAAAGAGTGCAGGGGAGTCG |
| LT2            | LT-offspring-8  | Bomo Chr5  | 17207321 | C   | A   | 23         | 12        | 11        | 0.48                   | intergenic | OUT | T          | ACATTACCGCCATTAGGGCA | TGAAAGCTGCCGCTCCTTAT  |
| LT3            | LT-offspring-7  | Bomo Chr28 | 8706402  | G   | A   | 25         | 13        | 12        | 0.48                   | intergenic | IN  | T          | CCTCCTGAAGCCAGATGGTG | CATCACCTATCCTCCCTCG   |
| LT4            | LT-offspring-6  | Bomo Chr26 | 11333293 | G   | T   | 20         | 10        | 10        | 0.50                   | intergenic | OUT | T          | GCGACAAGGTTTCAGAACTC | GGTTTCGTTCCCAACCCTCT  |
| LT5            | LT-offspring-8  | Bomo Chr14 | 3421776  | C   | T   | 25         | 12        | 13        | 0.52                   | intergenic | OUT | T          | GGGGAACCCCTCTGCCT    | TCCGCCAAAAAGTCCCTG    |
| LT6            | LT-offspring-6  | Bomo Chr4  | 7550538  | T   | A   | 23         | 11        | 12        | 0.52                   | intergenic | OUT | T          | CCGTATGCTGGTTCGTCGT  | TGCTGGTTATTCGTGACCGA  |
| LT7            | LT-offspring-2  | Bomo Chr21 | 10057248 | G   | T   | 27         | 12        | 15        | 0.56                   | intergenic | OUT | T          | GCTTGCCGGTCATTTTACCC | GCCTGTCTGAATACTTCG    |
| LT8            | LT-offspring-5  | Bomo Chr17 | 10028944 | G   | A   | 40         | 17        | 23        | 0.58                   | intron     | IN  | T          | CGGGGTGATCACACATTCCA | TGTGGGCGGTATGTAACTGC  |
| LT9            | LT-offspring-9  | Bomo Chr15 | 4949810  | A   | G   | 27         | 11        | 16        | 0.59                   | intergenic | OUT | T          | GGTCCGTTGGCAGATACCTC | GTGCTGAAAGCATAGCGGC   |
| LT10           | LT-offspring-6  | Bomo Chr11 | 11830078 | G   | A   | 20         | 8         | 12        | 0.60                   | exon       | OUT | T          | CGGAGTACAGTTAGCGCAGG | GAAGTGTTCGCACTGCTATTC |
| LT11           | LT-offspring-7  | Bomo Chr16 | 5281095  | C   | T   | 22         | 5         | 17        | 0.77                   | intergenic | OUT | T          | CGTTTCAGAAGCTCCAGTGC | CGGCTTATCTGATGTTCCGT  |
| LT12           | LT-offspring-3  | Bomo Chr17 | 14176597 | G   | T   | 17         | 11        | 6         | 0.35                   | intron     | OUT | T          | GTGTGGTGACATCGAGACGA | GCCATCTTAGCATCGACGTG  |
| LT13           | LT-offspring-8  | Bomo Chr20 | 6457627  | G   | T   | 25         | 16        | 9         | 0.36                   | intron     | OUT | T          | ACTGCGGGGTGTTCTTATG  | GCTTCCAGAGCCCAATCCT   |
| LT14           | LT-offspring-8  | Bomo Chr11 | 17195085 | C   | G   | 22         | 14        | 8         | 0.36                   | intron     | OUT | T          | TACCACAAGCATCGTCTCTG | CGTCATTAAGTCCGCACACG  |
| LT15           | LT-offspring-1  | Bomo Chr25 | 9833409  | G   | A   | 13         | 8         | 5         | 0.38                   | intron     | OUT | T          | ATCAGCGAGCCTTGAGTACG | GTTCCGAAGATCATGTCCG   |
| LT16           | LT-offspring-1  | Bomo Chr23 | 13500367 | A   | T   | 13         | 8         | 5         | 0.38                   | intergenic | IN  | T          | TCTGTGGGCGCATTTCTAAG | CGCTTGGGTAAGCATCAACG  |
| LT17           | LT-offspring-10 | Bomo Chr10 | 11837225 | G   | A   | 18         | 11        | 7         | 0.39                   | intergenic | OUT | T          | CTAGTCAAACCCGGCCCACT | TTGGTTCCAGGAGTCGCATC  |
| LT18           | LT-offspring-8  | Bomo Chr25 | 2872459  | C   | A   | 23         | 14        | 9         | 0.39                   | intergenic | OUT | T          | GAGGATCGTTTATTGGCGGA | CGGCTTAATTGTACGGCAC   |
| LT19           | LT-offspring-1  | Bomo Chr15 | 16941965 | T   | G   | 22         | 13        | 9         | 0.41                   | intron     | OUT | T          | AAAGGCGGACTGCCATTACT | TTCCACGCGCTTAATAGCCA  |
| LT20           | LT-offspring-4  | Bomo Chr10 | 15881638 | T   | C   | 29         | 17        | 12        | 0.41                   | exon       | OUT | T          | ACTAACCTGAAGCCGAAGC  | CTCGGACACCTCGTCGTATG  |
| LT21           | LT-offspring-6  | Bomo Chr13 | 1457891  | C   | T   | 12         | 7         | 5         | 0.42                   | intergenic | IN  | \          | \                    | \                     |
| LT22           | LT-offspring-1  | Bomo Chr12 | 7528199  | G   | A   | 30         | 17        | 13        | 0.43                   | intergenic | OUT | \          | \                    | \                     |
| LT23           | LT-offspring-5  | Bomo Chr3  | 212920   | A   | T   | 20         | 14        | 6         | 0.30                   | intergenic | OUT | \          | \                    | \                     |
| LT24           | LT-offspring-6  | Bomo Chr4  | 17564731 | C   | T   | 20         | 14        | 6         | 0.30                   | intergenic | OUT | \          | \                    | \                     |
| LT25           | LT-offspring-2  | Bomo Chr9  | 16563226 | C   | A   | 19         | 13        | 6         | 0.32                   | intron     | OUT | \          | \                    | \                     |
| LT26           | LT-offspring-7  | Bomo Chr7  | 12061125 | A   | G   | 22         | 15        | 7         | 0.32                   | intron     | OUT | \          | \                    | \                     |
| LT27           | LT-offspring-8  | Bomo Chr9  | 12498027 | C   | T   | 22         | 15        | 7         | 0.32                   | intergenic | OUT | \          | \                    | \                     |
| LT28           | LT-offspring-7  | Bomo Chr2  | 6725532  | A   | T   | 25         | 17        | 8         | 0.32                   | intergenic | OUT | \          | \                    | \                     |
| LT29           | LT-offspring-4  | Bomo Chr6  | 4398465  | G   | T   | 23         | 15        | 8         | 0.35                   | intergenic | OUT | \          | \                    | \                     |
| LT30           | LT-offspring-8  | Bomo Chr4  | 7688387  | C   | T   | 11         | 7         | 4         | 0.36                   | intergenic | OUT | \          | \                    | \                     |
| LT31           | LT-offspring-2  | Bomo Chr4  | 3879418  | T   | C   | 15         | 9         | 6         | 0.40                   | intergenic | OUT | \          | \                    | \                     |
| LT32           | LT-offspring-9  | Bomo Chr9  | 9965125  | A   | G   | 22         | 13        | 9         | 0.41                   | intergenic | OUT | \          | \                    | \                     |
| LT33           | LT-offspring-10 | Bomo Chr25 | 4214457  | A   | C   | 12         | 7         | 5         | 0.42                   | intergenic | OUT | \          | \                    | \                     |
| LT34           | LT-offspring-4  | Bomo Chr12 | 12910891 | C   | A   | 24         | 14        | 10        | 0.42                   | intergenic | OUT | \          | \                    | \                     |

Supplementary table S2 continue

|      |                 |            |          |   |   |    |    |    |      |            |     |   |   |   |
|------|-----------------|------------|----------|---|---|----|----|----|------|------------|-----|---|---|---|
| LT35 | LT-offspring-3  | Bomo Chr12 | 10113395 | C | A | 28 | 16 | 12 | 0.43 | intergenic | OUT | \ | \ | \ |
| LT36 | LT-offspring-2  | Bomo Chr28 | 8398364  | G | A | 25 | 14 | 11 | 0.44 | intron     | OUT | \ | \ | \ |
| LT37 | LT-offspring-6  | Bomo Chr5  | 16870856 | G | A | 18 | 10 | 8  | 0.44 | intergenic | IN  | \ | \ | \ |
| LT38 | LT-offspring-1  | Bomo Chr7  | 2632017  | A | T | 29 | 16 | 13 | 0.45 | intergenic | IN  | \ | \ | \ |
| LT39 | LT-offspring-9  | Bomo Chr4  | 8346938  | T | C | 11 | 6  | 5  | 0.45 | intron     | OUT | \ | \ | \ |
| LT40 | LT-offspring-10 | Bomo Chr16 | 9404338  | T | C | 22 | 11 | 11 | 0.50 | intron     | OUT | \ | \ | \ |
| LT41 | LT-offspring-6  | Bomo Chr25 | 11619771 | T | C | 14 | 7  | 7  | 0.50 | exon       | OUT | \ | \ | \ |
| LT42 | LT-offspring-5  | Bomo Chr10 | 12061810 | A | G | 18 | 9  | 9  | 0.50 | intergenic | OUT | \ | \ | \ |
| LT43 | LT-offspring-6  | Bomo Chr25 | 13991804 | T | A | 18 | 9  | 9  | 0.50 | intergenic | OUT | \ | \ | \ |
| LT44 | LT-offspring-8  | Bomo Chr22 | 3454265  | C | T | 26 | 12 | 14 | 0.54 | intergenic | OUT | \ | \ | \ |
| LT45 | LT-offspring-7  | Bomo Chr16 | 2634170  | C | T | 23 | 10 | 13 | 0.57 | intergenic | OUT | \ | \ | \ |
| LT46 | LT-offspring-6  | Bomo Chr27 | 9736194  | T | C | 19 | 8  | 11 | 0.58 | intergenic | OUT | \ | \ | \ |
| LT47 | LT-offspring-7  | Bomo Chr4  | 2457498  | T | C | 11 | 4  | 7  | 0.64 | intron     | OUT | \ | \ | \ |

**Supplementary table S3.** The callable sites, *de novo* mutations and mutation rate of A/T bases and C/G bases of each genome.

| Normal condition |      |                |      |               |
|------------------|------|----------------|------|---------------|
| Samples          | Type | Callable sites | DNMs | Mutation rate |
| NC-offspring-1   | A/T  | 268958939      | 3    | 5.58E-09      |
|                  | C/G  | 174789627      | 2    | 5.72E-09      |
| NC-offspring-2   | A/T  | 269200386      | 2    | 3.71E-09      |
|                  | C/G  | 174963584      | 3    | 8.57E-09      |
| NC-offspring-3   | A/T  | 268978318      | 1    | 1.86E-09      |
|                  | C/G  | 174805058      | 1    | 2.86E-09      |
| NC-offspring-4   | A/T  | 268993707      | 2    | 3.72E-09      |
|                  | C/G  | 174814567      | 4    | 1.14E-08      |
| NC-offspring-5   | A/T  | 269084915      | 0    | 0.00E+00      |
|                  | C/G  | 174878885      | 0    | 0.00E+00      |
| NC-offspring-6   | A/T  | 269114062      | 2    | 3.72E-09      |
|                  | C/G  | 174898390      | 0    | 0.00E+00      |
| NC-offspring-7   | A/T  | 269030733      | 0    | 0.00E+00      |
|                  | C/G  | 174844270      | 1    | 2.86E-09      |
| NC-offspring-8   | A/T  | 268625491      | 1    | 1.86E-09      |
|                  | C/G  | 174556031      | 2    | 5.73E-09      |
| NC-offspring-9   | A/T  | 269124370      | 3    | 5.57E-09      |
|                  | C/G  | 174907598      | 0    | 0.00E+00      |
| NC-offspring-10  | A/T  | 268780770      | 3    | 5.58E-09      |
|                  | C/G  | 174662354      | 1    | 2.86E-09      |
| NC-offspring-11  | A/T  | 269141698      | 1    | 1.86E-09      |
|                  | C/G  | 174920238      | 4    | 1.14E-08      |
| NC-offspring-12  | A/T  | 269005495      | 3    | 5.58E-09      |
|                  | C/G  | 174823757      | 1    | 2.86E-09      |
| NC-offspring-13  | A/T  | 268407932      | 4    | 7.45E-09      |
|                  | C/G  | 174404284      | 4    | 1.15E-08      |
| NC-offspring-14  | A/T  | 269145423      | 2    | 3.72E-09      |
|                  | C/G  | 174921096      | 2    | 5.72E-09      |
| NC-offspring-15  | A/T  | 268979652      | 3    | 5.58E-09      |
|                  | C/G  | 174805945      | 1    | 2.86E-09      |
| NC-offspring-16  | A/T  | 268752876      | 3    | 5.58E-09      |
|                  | C/G  | 174681921      | 0    | 0.00E+00      |
| NC-offspring-17  | A/T  | 268345513      | 2    | 3.73E-09      |
|                  | C/G  | 174427833      | 1    | 2.87E-09      |
| NC-offspring-18  | A/T  | 268921117      | 4    | 7.44E-09      |
|                  | C/G  | 174788996      | 3    | 8.58E-09      |
| NC-offspring-19  | A/T  | 268929646      | 1    | 1.86E-09      |
|                  | C/G  | 174794804      | 3    | 8.58E-09      |
| NC-offspring-20  | A/T  | 268687451      | 1    | 1.86E-09      |
|                  | C/G  | 174641563      | 0    | 0.00E+00      |
| NC-offspring-21  | A/T  | 269022366      | 3    | 5.58E-09      |
|                  | C/G  | 174854186      | 2    | 5.72E-09      |
| NC-offspring-22  | A/T  | 268650981      | 2    | 3.72E-09      |
|                  | C/G  | 174620880      | 0    | 0.00E+00      |
| NC-offspring-23  | A/T  | 269108936      | 3    | 5.57E-09      |
|                  | C/G  | 174909819      | 3    | 8.58E-09      |
| NC-offspring-24  | A/T  | 268556123      | 1    | 1.86E-09      |
|                  | C/G  | 174557512      | 2    | 5.73E-09      |
| NC-offspring-25  | A/T  | 268054890      | 1    | 1.87E-09      |
|                  | C/G  | 174247081      | 0    | 0.00E+00      |
| NC-offspring-26  | A/T  | 268933941      | 1    | 1.86E-09      |
|                  | C/G  | 174798600      | 1    | 2.86E-09      |

Supplementary table S3 continue

|                         |             |                       |             |                      |
|-------------------------|-------------|-----------------------|-------------|----------------------|
| NC-offspring-27         | A/T         | 268994300             | 3           | 5.58E-09             |
|                         | C/G         | 174835925             | 1           | 2.86E-09             |
| NC-offspring-28         | A/T         | 269050711             | 2           | 3.72E-09             |
|                         | C/G         | 174868715             | 1           | 2.86E-09             |
| NC-offspring-29         | A/T         | 268513143             | 1           | 1.86E-09             |
|                         | C/G         | 174528449             | 2           | 5.73E-09             |
| NC-offspring-30         | A/T         | 269015363             | 0           | 0.00E+00             |
|                         | C/G         | 174848604             | 3           | 8.58E-09             |
| <b>High temperature</b> |             |                       |             |                      |
| <b>Samples</b>          | <b>Type</b> | <b>Callable sites</b> | <b>DNMs</b> | <b>Mutation rate</b> |
| HT-offspring-1          | A/T         | 265048089             | 1           | 1.89E-09             |
|                         | C/G         | 172554609             | 2           | 5.80E-09             |
| HT-offspring-2          | A/T         | 261746005             | 1           | 1.91E-09             |
|                         | C/G         | 170466498             | 3           | 8.80E-09             |
| HT-offspring-3          | A/T         | 261772711             | 4           | 7.64E-09             |
|                         | C/G         | 170486422             | 5           | 1.47E-08             |
| HT-offspring-4          | A/T         | 263335186             | 2           | 3.80E-09             |
|                         | C/G         | 171469721             | 3           | 8.75E-09             |
| HT-offspring-5          | A/T         | 252798370             | 2           | 3.96E-09             |
|                         | C/G         | 164779421             | 1           | 3.03E-09             |
| HT-offspring-6          | A/T         | 267105816             | 3           | 5.62E-09             |
|                         | C/G         | 173746991             | 1           | 2.88E-09             |
| HT-offspring-7          | A/T         | 265101785             | 2           | 3.77E-09             |
|                         | C/G         | 172443584             | 2           | 5.80E-09             |
| HT-offspring-8          | A/T         | 267483994             | 2           | 3.74E-09             |
|                         | C/G         | 173971981             | 6           | 1.72E-08             |
| HT-offspring-9          | A/T         | 267169550             | 1           | 1.87E-09             |
|                         | C/G         | 173811460             | 1           | 2.88E-09             |
| HT-offspring-10         | A/T         | 265606109             | 2           | 3.76E-09             |
|                         | C/G         | 172811499             | 4           | 1.16E-08             |
| <b>Low temperature</b>  |             |                       |             |                      |
| <b>Samples</b>          | <b>Type</b> | <b>Callable sites</b> | <b>DNMs</b> | <b>Mutation rate</b> |
| LT-offspring-1          | A/T         | 265699268             | 3           | 5.65E-09             |
|                         | C/G         | 172958036             | 2           | 5.78E-09             |
| LT-offspring-2          | A/T         | 262779672             | 1           | 1.90E-09             |
|                         | C/G         | 171127905             | 3           | 8.77E-09             |
| LT-offspring-3          | A/T         | 257273764             | 0           | 0.00E+00             |
|                         | C/G         | 167625386             | 2           | 5.97E-09             |
| LT-offspring-4          | A/T         | 263784094             | 1           | 1.90E-09             |
|                         | C/G         | 171776500             | 2           | 5.82E-09             |
| LT-offspring-5          | A/T         | 267046686             | 3           | 5.62E-09             |
|                         | C/G         | 173815896             | 1           | 2.88E-09             |
| LT-offspring-6          | A/T         | 265184276             | 4           | 7.54E-09             |
|                         | C/G         | 172440811             | 5           | 1.45E-08             |
| LT-offspring-7          | A/T         | 266902471             | 3           | 5.62E-09             |
|                         | C/G         | 173667506             | 3           | 8.64E-09             |
| LT-offspring-8          | A/T         | 264431329             | 0           | 0.00E+00             |
|                         | C/G         | 172033565             | 8           | 2.33E-08             |
| LT-offspring-9          | A/T         | 267312758             | 3           | 5.61E-09             |
|                         | C/G         | 173883212             | 0           | 0.00E+00             |
| LT-offspring-10         | A/T         | 265638240             | 2           | 3.76E-09             |
|                         | C/G         | 172788578             | 1           | 2.89E-09             |



**Supplementary table S4.** The callable sites, *de novo* mutations and mutation rate of each mutation type of each genome.

| Normal condition |               |                |      |               |
|------------------|---------------|----------------|------|---------------|
| Sample           | Mutation type | Callable sites | DNMs | Mutation rate |
| NC-offspring-1   | A:T→C:G       | 268958939      | 0    | 0.00E+00      |
|                  | A:T→G:C       | 268958939      | 2    | 3.72E-09      |
|                  | A:T→T:A       | 268958939      | 1    | 1.86E-09      |
|                  | G:C→A:T       | 174789627      | 1    | 2.86E-09      |
|                  | G:C→C:G       | 174789627      | 0    | 0.00E+00      |
|                  | G:C→T:A       | 174789627      | 1    | 2.86E-09      |
| NC-offspring-2   | A:T→C:G       | 269200386      | 1    | 1.86E-09      |
|                  | A:T→G:C       | 269200386      | 0    | 0.00E+00      |
|                  | A:T→T:A       | 269200386      | 1    | 1.86E-09      |
|                  | G:C→A:T       | 174963584      | 3    | 8.57E-09      |
|                  | G:C→C:G       | 174963584      | 0    | 0.00E+00      |
|                  | G:C→T:A       | 174963584      | 0    | 0.00E+00      |
| NC-offspring-3   | A:T→C:G       | 268978318      | 0    | 0.00E+00      |
|                  | A:T→G:C       | 268978318      | 0    | 0.00E+00      |
|                  | A:T→T:A       | 268978318      | 1    | 1.86E-09      |
|                  | G:C→A:T       | 174805058      | 1    | 2.86E-09      |
|                  | G:C→C:G       | 174805058      | 0    | 0.00E+00      |
|                  | G:C→T:A       | 174805058      | 0    | 0.00E+00      |
| NC-offspring-4   | A:T→C:G       | 268993707      | 0    | 0.00E+00      |
|                  | A:T→G:C       | 268993707      | 2    | 3.72E-09      |
|                  | A:T→T:A       | 268993707      | 0    | 0.00E+00      |
|                  | G:C→A:T       | 174814567      | 3    | 8.58E-09      |
|                  | G:C→C:G       | 174814567      | 0    | 0.00E+00      |
|                  | G:C→T:A       | 174814567      | 1    | 2.86E-09      |
| NC-offspring-5   | A:T→C:G       | 269084915      | 0    | 0.00E+00      |
|                  | A:T→G:C       | 269084915      | 0    | 0.00E+00      |
|                  | A:T→T:A       | 269084915      | 0    | 0.00E+00      |
|                  | G:C→A:T       | 174878885      | 0    | 0.00E+00      |
|                  | G:C→C:G       | 174878885      | 0    | 0.00E+00      |
|                  | G:C→T:A       | 174878885      | 0    | 0.00E+00      |
| NC-offspring-6   | A:T→C:G       | 269114062      | 1    | 1.86E-09      |
|                  | A:T→G:C       | 269114062      | 1    | 1.86E-09      |
|                  | A:T→T:A       | 269114062      | 0    | 0.00E+00      |
|                  | G:C→A:T       | 174898390      | 0    | 0.00E+00      |
|                  | G:C→C:G       | 174898390      | 0    | 0.00E+00      |
|                  | G:C→T:A       | 174898390      | 0    | 0.00E+00      |
| NC-offspring-7   | A:T→C:G       | 269030733      | 0    | 0.00E+00      |
|                  | A:T→G:C       | 269030733      | 0    | 0.00E+00      |
|                  | A:T→T:A       | 269030733      | 0    | 0.00E+00      |
|                  | G:C→A:T       | 174844270      | 1    | 2.86E-09      |
|                  | G:C→C:G       | 174844270      | 0    | 0.00E+00      |
|                  | G:C→T:A       | 174844270      | 0    | 0.00E+00      |
| NC-offspring-8   | A:T→C:G       | 268625491      | 0    | 0.00E+00      |
|                  | A:T→G:C       | 268625491      | 1    | 1.86E-09      |
|                  | A:T→T:A       | 268625491      | 0    | 0.00E+00      |
|                  | G:C→A:T       | 174556031      | 1    | 2.86E-09      |
|                  | G:C→C:G       | 174556031      | 0    | 0.00E+00      |
|                  | G:C→T:A       | 174556031      | 1    | 2.86E-09      |
| NC-offspring-9   | A:T→C:G       | 269124370      | 1    | 1.86E-09      |
|                  | A:T→G:C       | 269124370      | 0    | 0.00E+00      |
|                  | A:T→T:A       | 269124370      | 2    | 3.72E-09      |
|                  | G:C→A:T       | 174907598      | 0    | 0.00E+00      |

Supplementary table S4 continue

|                 |         |           |   |          |
|-----------------|---------|-----------|---|----------|
|                 | G:C→C:G | 174907598 | 0 | 0.00E+00 |
|                 | G:C→T:A | 174907598 | 0 | 0.00E+00 |
| NC-offspring-10 | A:T→C:G | 268780770 | 0 | 0.00E+00 |
|                 | A:T→G:C | 268780770 | 1 | 1.86E-09 |
|                 | A:T→T:A | 268780770 | 2 | 3.72E-09 |
|                 | G:C→A:T | 174662354 | 0 | 0.00E+00 |
|                 | G:C→C:G | 174662354 | 0 | 0.00E+00 |
|                 | G:C→T:A | 174662354 | 1 | 2.86E-09 |
| NC-offspring-11 | A:T→C:G | 269141698 | 1 | 1.86E-09 |
|                 | A:T→G:C | 269141698 | 0 | 0.00E+00 |
|                 | A:T→T:A | 269141698 | 0 | 0.00E+00 |
|                 | G:C→A:T | 174920238 | 3 | 8.58E-09 |
|                 | G:C→C:G | 174920238 | 0 | 0.00E+00 |
|                 | G:C→T:A | 174920238 | 1 | 2.86E-09 |
| NC-offspring-12 | A:T→C:G | 269005495 | 0 | 0.00E+00 |
|                 | A:T→G:C | 269005495 | 1 | 1.86E-09 |
|                 | A:T→T:A | 269005495 | 2 | 3.72E-09 |
|                 | G:C→A:T | 174823757 | 1 | 2.86E-09 |
|                 | G:C→C:G | 174823757 | 0 | 0.00E+00 |
|                 | G:C→T:A | 174823757 | 0 | 0.00E+00 |
| NC-offspring-13 | A:T→C:G | 268407932 | 0 | 0.00E+00 |
|                 | A:T→G:C | 268407932 | 3 | 5.59E-09 |
|                 | A:T→T:A | 268407932 | 1 | 1.86E-09 |
|                 | G:C→A:T | 174404284 | 4 | 1.15E-08 |
|                 | G:C→C:G | 174404284 | 0 | 0.00E+00 |
|                 | G:C→T:A | 174404284 | 0 | 0.00E+00 |
| NC-offspring-14 | A:T→C:G | 269145423 | 0 | 0.00E+00 |
|                 | A:T→G:C | 269145423 | 0 | 0.00E+00 |
|                 | A:T→T:A | 269145423 | 2 | 3.72E-09 |
|                 | G:C→A:T | 174921096 | 1 | 2.86E-09 |
|                 | G:C→C:G | 174921096 | 1 | 2.86E-09 |
|                 | G:C→T:A | 174921096 | 0 | 0.00E+00 |
| NC-offspring-15 | A:T→C:G | 268979652 | 2 | 3.72E-09 |
|                 | A:T→G:C | 268979652 | 0 | 0.00E+00 |
|                 | A:T→T:A | 268979652 | 1 | 1.86E-09 |
|                 | G:C→A:T | 174805945 | 1 | 2.86E-09 |
|                 | G:C→C:G | 174805945 | 0 | 0.00E+00 |
|                 | G:C→T:A | 174805945 | 0 | 0.00E+00 |
| NC-offspring-16 | A:T→C:G | 268752876 | 0 | 0.00E+00 |
|                 | A:T→G:C | 268752876 | 2 | 3.72E-09 |
|                 | A:T→T:A | 268752876 | 1 | 1.86E-09 |
|                 | G:C→A:T | 174681921 | 0 | 0.00E+00 |
|                 | G:C→C:G | 174681921 | 0 | 0.00E+00 |
|                 | G:C→T:A | 174681921 | 0 | 0.00E+00 |
| NC-offspring-17 | A:T→C:G | 268345513 | 0 | 0.00E+00 |
|                 | A:T→G:C | 268345513 | 1 | 1.86E-09 |
|                 | A:T→T:A | 268345513 | 1 | 1.86E-09 |
|                 | G:C→A:T | 174427833 | 1 | 2.87E-09 |
|                 | G:C→C:G | 174427833 | 0 | 0.00E+00 |
|                 | G:C→T:A | 174427833 | 0 | 0.00E+00 |
| NC-offspring-18 | A:T→C:G | 268921117 | 0 | 0.00E+00 |
|                 | A:T→G:C | 268921117 | 3 | 5.58E-09 |
|                 | A:T→T:A | 268921117 | 1 | 1.86E-09 |
|                 | G:C→A:T | 174788996 | 2 | 5.72E-09 |
|                 | G:C→C:G | 174788996 | 1 | 2.86E-09 |
|                 | G:C→T:A | 174788996 | 0 | 0.00E+00 |
|                 | A:T→C:G | 268929646 | 0 | 0.00E+00 |
|                 | A:T→G:C | 268929646 | 0 | 0.00E+00 |

Supplementary table S4 continue

|                 |         |           |   |          |
|-----------------|---------|-----------|---|----------|
| NC-offspring-19 | A:T→T:A | 268929646 | 1 | 1.86E-09 |
|                 | G:C→A:T | 174794804 | 3 | 8.58E-09 |
|                 | G:C→C:G | 174794804 | 0 | 0.00E+00 |
|                 | G:C→T:A | 174794804 | 0 | 0.00E+00 |
| NC-offspring-20 | A:T→C:G | 268687451 | 0 | 0.00E+00 |
|                 | A:T→G:C | 268687451 | 0 | 0.00E+00 |
|                 | A:T→T:A | 268687451 | 1 | 1.86E-09 |
|                 | G:C→A:T | 174641563 | 0 | 0.00E+00 |
|                 | G:C→C:G | 174641563 | 0 | 0.00E+00 |
|                 | G:C→T:A | 174641563 | 0 | 0.00E+00 |
| NC-offspring-21 | A:T→C:G | 269022366 | 0 | 0.00E+00 |
|                 | A:T→G:C | 269022366 | 1 | 1.86E-09 |
|                 | A:T→T:A | 269022366 | 2 | 3.72E-09 |
|                 | G:C→A:T | 174854186 | 0 | 0.00E+00 |
|                 | G:C→C:G | 174854186 | 0 | 0.00E+00 |
|                 | G:C→T:A | 174854186 | 2 | 5.72E-09 |
| NC-offspring-22 | A:T→C:G | 268650981 | 0 | 0.00E+00 |
|                 | A:T→G:C | 268650981 | 1 | 1.86E-09 |
|                 | A:T→T:A | 268650981 | 1 | 1.86E-09 |
|                 | G:C→A:T | 174620880 | 0 | 0.00E+00 |
|                 | G:C→C:G | 174620880 | 0 | 0.00E+00 |
|                 | G:C→T:A | 174620880 | 0 | 0.00E+00 |
| NC-offspring-23 | A:T→C:G | 269108936 | 0 | 0.00E+00 |
|                 | A:T→G:C | 269108936 | 3 | 5.57E-09 |
|                 | A:T→T:A | 269108936 | 0 | 0.00E+00 |
|                 | G:C→A:T | 174909819 | 3 | 8.58E-09 |
|                 | G:C→C:G | 174909819 | 0 | 0.00E+00 |
|                 | G:C→T:A | 174909819 | 0 | 0.00E+00 |
| NC-offspring-24 | A:T→C:G | 268556123 | 0 | 0.00E+00 |
|                 | A:T→G:C | 268556123 | 0 | 0.00E+00 |
|                 | A:T→T:A | 268556123 | 1 | 1.86E-09 |
|                 | G:C→A:T | 174557512 | 1 | 2.86E-09 |
|                 | G:C→C:G | 174557512 | 0 | 0.00E+00 |
|                 | G:C→T:A | 174557512 | 1 | 2.86E-09 |
| NC-offspring-25 | A:T→C:G | 268054890 | 0 | 0.00E+00 |
|                 | A:T→G:C | 268054890 | 1 | 1.87E-09 |
|                 | A:T→T:A | 268054890 | 0 | 0.00E+00 |
|                 | G:C→A:T | 174247081 | 0 | 0.00E+00 |
|                 | G:C→C:G | 174247081 | 0 | 0.00E+00 |
|                 | G:C→T:A | 174247081 | 0 | 0.00E+00 |
| NC-offspring-26 | A:T→C:G | 268933941 | 0 | 0.00E+00 |
|                 | A:T→G:C | 268933941 | 0 | 0.00E+00 |
|                 | A:T→T:A | 268933941 | 1 | 1.86E-09 |
|                 | G:C→A:T | 174798600 | 1 | 2.86E-09 |
|                 | G:C→C:G | 174798600 | 0 | 0.00E+00 |
|                 | G:C→T:A | 174798600 | 0 | 0.00E+00 |
| NC-offspring-27 | A:T→C:G | 268994300 | 1 | 1.86E-09 |
|                 | A:T→G:C | 268994300 | 2 | 3.72E-09 |
|                 | A:T→T:A | 268994300 | 0 | 0.00E+00 |
|                 | G:C→A:T | 174835925 | 1 | 2.86E-09 |
|                 | G:C→C:G | 174835925 | 0 | 0.00E+00 |
|                 | G:C→T:A | 174835925 | 0 | 0.00E+00 |
| NC-offspring-28 | A:T→C:G | 269050711 | 0 | 0.00E+00 |
|                 | A:T→G:C | 269050711 | 1 | 1.86E-09 |
|                 | A:T→T:A | 269050711 | 1 | 1.86E-09 |
|                 | G:C→A:T | 174868715 | 0 | 0.00E+00 |
|                 | G:C→C:G | 174868715 | 0 | 0.00E+00 |
|                 | G:C→T:A | 174868715 | 1 | 2.86E-09 |

Supplementary table S4 continue

|                 |         |           |   |          |
|-----------------|---------|-----------|---|----------|
| NC-offspring-29 | A:T→C:G | 268513143 | 0 | 0.00E+00 |
|                 | A:T→G:C | 268513143 | 1 | 1.86E-09 |
|                 | A:T→T:A | 268513143 | 0 | 0.00E+00 |
|                 | G:C→A:T | 174528449 | 1 | 2.86E-09 |
|                 | G:C→C:G | 174528449 | 0 | 0.00E+00 |
|                 | G:C→T:A | 174528449 | 1 | 2.86E-09 |
| NC-offspring-30 | A:T→C:G | 269015363 | 0 | 0.00E+00 |
|                 | A:T→G:C | 269015363 | 0 | 0.00E+00 |
|                 | A:T→T:A | 269015363 | 0 | 0.00E+00 |
|                 | G:C→A:T | 174848604 | 1 | 2.86E-09 |
|                 | G:C→C:G | 174848604 | 2 | 5.72E-09 |
|                 | G:C→T:A | 174848604 | 0 | 0.00E+00 |

| High temperature |                |                |      |               |
|------------------|----------------|----------------|------|---------------|
| Sample           | Mutation types | Callable sites | DNMs | Mutation rate |
| HT-offspring-1   | A:T→C:G        | 265048089      | 0    | 0.00E+00      |
|                  | A:T→G:C        | 265048089      | 1    | 1.89E-09      |
|                  | A:T→T:A        | 265048089      | 0    | 0.00E+00      |
|                  | G:C→A:T        | 172554609      | 1    | 2.90E-09      |
|                  | G:C→C:G        | 172554609      | 1    | 2.90E-09      |
|                  | G:C→T:A        | 172554609      | 0    | 0.00E+00      |
| HT-offspring-2   | A:T→C:G        | 261746005      | 0    | 0.00E+00      |
|                  | A:T→G:C        | 261746005      | 0    | 0.00E+00      |
|                  | A:T→T:A        | 261746005      | 1    | 1.91E-09      |
|                  | G:C→A:T        | 170466498      | 3    | 8.80E-09      |
|                  | G:C→C:G        | 170466498      | 0    | 0.00E+00      |
|                  | G:C→T:A        | 170466498      | 0    | 0.00E+00      |
| HT-offspring-3   | A:T→C:G        | 261772711      | 0    | 0.00E+00      |
|                  | A:T→G:C        | 261772711      | 3    | 5.73E-09      |
|                  | A:T→T:A        | 261772711      | 1    | 1.91E-09      |
|                  | G:C→A:T        | 170486422      | 3    | 8.80E-09      |
|                  | G:C→C:G        | 170486422      | 0    | 0.00E+00      |
|                  | G:C→T:A        | 170486422      | 2    | 5.87E-09      |
| HT-offspring-4   | A:T→C:G        | 263335186      | 1    | 1.90E-09      |
|                  | A:T→G:C        | 263335186      | 1    | 1.90E-09      |
|                  | A:T→T:A        | 263335186      | 0    | 0.00E+00      |
|                  | G:C→A:T        | 171469721      | 1    | 2.92E-09      |
|                  | G:C→C:G        | 171469721      | 1    | 2.92E-09      |
|                  | G:C→T:A        | 171469721      | 1    | 2.92E-09      |
| HT-offspring-5   | A:T→C:G        | 252798370      | 1    | 1.98E-09      |
|                  | A:T→G:C        | 252798370      | 1    | 1.98E-09      |
|                  | A:T→T:A        | 252798370      | 0    | 0.00E+00      |
|                  | G:C→A:T        | 164779421      | 1    | 3.03E-09      |
|                  | G:C→C:G        | 164779421      | 0    | 0.00E+00      |
|                  | G:C→T:A        | 164779421      | 0    | 0.00E+00      |
| HT-offspring-6   | A:T→C:G        | 267105816      | 2    | 3.74E-09      |
|                  | A:T→G:C        | 267105816      | 1    | 1.87E-09      |
|                  | A:T→T:A        | 267105816      | 0    | 0.00E+00      |
|                  | G:C→A:T        | 173746991      | 0    | 0.00E+00      |
|                  | G:C→C:G        | 173746991      | 1    | 2.88E-09      |
|                  | G:C→T:A        | 173746991      | 0    | 0.00E+00      |
| HT-offspring-7   | A:T→C:G        | 265101785      | 0    | 0.00E+00      |
|                  | A:T→G:C        | 265101785      | 1    | 1.89E-09      |
|                  | A:T→T:A        | 265101785      | 1    | 1.89E-09      |
|                  | G:C→A:T        | 172443584      | 2    | 5.80E-09      |
|                  | G:C→C:G        | 172443584      | 0    | 0.00E+00      |
|                  | G:C→T:A        | 172443584      | 0    | 0.00E+00      |
|                  | A:T→C:G        | 267483994      | 0    | 0.00E+00      |

Supplementary table S4 continue

|                 |         |           |   |          |
|-----------------|---------|-----------|---|----------|
| HT-offspring-8  | A:T→G:C | 267483994 | 2 | 3.74E-09 |
|                 | A:T→T:A | 267483994 | 0 | 0.00E+00 |
|                 | G:C→A:T | 173971981 | 5 | 1.44E-08 |
|                 | G:C→C:G | 173971981 | 0 | 0.00E+00 |
|                 | G:C→T:A | 173971981 | 1 | 2.87E-09 |
| HT-offspring-9  | A:T→C:G | 267169550 | 0 | 0.00E+00 |
|                 | A:T→G:C | 267169550 | 1 | 1.87E-09 |
|                 | A:T→T:A | 267169550 | 0 | 0.00E+00 |
|                 | G:C→A:T | 173811460 | 1 | 2.88E-09 |
|                 | G:C→C:G | 173811460 | 0 | 0.00E+00 |
|                 | G:C→T:A | 173811460 | 0 | 0.00E+00 |
| HT-offspring-10 | A:T→C:G | 265606109 | 0 | 0.00E+00 |
|                 | A:T→G:C | 265606109 | 1 | 1.88E-09 |
|                 | A:T→T:A | 265606109 | 1 | 1.88E-09 |
|                 | G:C→A:T | 172811499 | 0 | 0.00E+00 |
|                 | G:C→C:G | 172811499 | 2 | 5.79E-09 |
|                 | G:C→T:A | 172811499 | 2 | 5.79E-09 |

| Low temperature |                |                |      |               |
|-----------------|----------------|----------------|------|---------------|
| Samples         | Mutation types | Callable sites | DNMs | Mutation rate |
| LT-offspring-1  | A:T→C:G        | 265699268      | 1    | 1.88E-09      |
|                 | A:T→G:C        | 265699268      | 0    | 0.00E+00      |
|                 | A:T→T:A        | 265699268      | 2    | 3.76E-09      |
|                 | G:C→A:T        | 172958036      | 2    | 5.78E-09      |
|                 | G:C→C:G        | 172958036      | 0    | 0.00E+00      |
|                 | G:C→T:A        | 172958036      | 0    | 0.00E+00      |
| LT-offspring-2  | A:T→C:G        | 262779672      | 0    | 0.00E+00      |
|                 | A:T→G:C        | 262779672      | 1    | 1.90E-09      |
|                 | A:T→T:A        | 262779672      | 0    | 0.00E+00      |
|                 | G:C→A:T        | 171127905      | 1    | 2.92E-09      |
|                 | G:C→C:G        | 171127905      | 0    | 0.00E+00      |
|                 | G:C→T:A        | 171127905      | 2    | 5.84E-09      |
| LT-offspring-3  | A:T→C:G        | 257273764      | 0    | 0.00E+00      |
|                 | A:T→G:C        | 257273764      | 0    | 0.00E+00      |
|                 | A:T→T:A        | 257273764      | 0    | 0.00E+00      |
|                 | G:C→A:T        | 167625386      | 0    | 0.00E+00      |
|                 | G:C→C:G        | 167625386      | 0    | 0.00E+00      |
|                 | G:C→T:A        | 167625386      | 2    | 5.97E-09      |
| LT-offspring-4  | A:T→C:G        | 263784094      | 0    | 0.00E+00      |
|                 | A:T→G:C        | 263784094      | 1    | 1.90E-09      |
|                 | A:T→T:A        | 263784094      | 0    | 0.00E+00      |
|                 | G:C→A:T        | 171776500      | 0    | 0.00E+00      |
|                 | G:C→C:G        | 171776500      | 0    | 0.00E+00      |
|                 | G:C→T:A        | 171776500      | 2    | 5.82E-09      |
| LT-offspring-5  | A:T→C:G        | 267046686      | 1    | 1.87E-09      |
|                 | A:T→G:C        | 267046686      | 1    | 1.87E-09      |
|                 | A:T→T:A        | 267046686      | 1    | 1.87E-09      |
|                 | G:C→A:T        | 173815896      | 1    | 2.88E-09      |
|                 | G:C→C:G        | 173815896      | 0    | 0.00E+00      |
|                 | G:C→T:A        | 173815896      | 0    | 0.00E+00      |
| LT-offspring-6  | A:T→C:G        | 265184276      | 0    | 0.00E+00      |
|                 | A:T→G:C        | 265184276      | 2    | 3.77E-09      |
|                 | A:T→T:A        | 265184276      | 2    | 3.77E-09      |
|                 | G:C→A:T        | 172440811      | 4    | 1.16E-08      |
|                 | G:C→C:G        | 172440811      | 0    | 0.00E+00      |
|                 | G:C→T:A        | 172440811      | 1    | 2.90E-09      |
|                 | A:T→C:G        | 266902471      | 0    | 0.00E+00      |
|                 | A:T→G:C        | 266902471      | 2    | 3.75E-09      |

Supplementary table S4 continue

|                 |         |           |   |          |
|-----------------|---------|-----------|---|----------|
| LT-offspring-7  | A:T→T:A | 266902471 | 1 | 1.87E-09 |
|                 | G:C→A:T | 173667506 | 3 | 8.64E-09 |
|                 | G:C→C:G | 173667506 | 0 | 0.00E+00 |
|                 | G:C→T:A | 173667506 | 0 | 0.00E+00 |
| LT-offspring-8  | A:T→C:G | 264431329 | 0 | 0.00E+00 |
|                 | A:T→G:C | 264431329 | 0 | 0.00E+00 |
|                 | A:T→T:A | 264431329 | 0 | 0.00E+00 |
|                 | G:C→A:T | 172033565 | 4 | 1.16E-08 |
|                 | G:C→C:G | 172033565 | 1 | 2.91E-09 |
|                 | G:C→T:A | 172033565 | 3 | 8.72E-09 |
| LT-offspring-9  | A:T→C:G | 267312758 | 0 | 0.00E+00 |
|                 | A:T→G:C | 267312758 | 3 | 5.61E-09 |
|                 | A:T→T:A | 267312758 | 0 | 0.00E+00 |
|                 | G:C→A:T | 173883212 | 0 | 0.00E+00 |
|                 | G:C→C:G | 173883212 | 0 | 0.00E+00 |
|                 | G:C→T:A | 173883212 | 0 | 0.00E+00 |
| LT-offspring-10 | A:T→C:G | 265638240 | 1 | 1.88E-09 |
|                 | A:T→G:C | 265638240 | 1 | 1.88E-09 |
|                 | A:T→T:A | 265638240 | 0 | 0.00E+00 |
|                 | G:C→A:T | 172788578 | 1 | 2.89E-09 |
|                 | G:C→C:G | 172788578 | 0 | 0.00E+00 |
|                 | G:C→T:A | 172788578 | 0 | 0.00E+00 |

**Supplementary table S5.** The callable sites, *de novo* mutations and mutation rate of each genome in the silkworms under different conditions.

| <b>Normal conditions</b> |                       |             |                      |                                |
|--------------------------|-----------------------|-------------|----------------------|--------------------------------|
| <b>Samples</b>           | <b>Callable sites</b> | <b>DNMs</b> | <b>Mutation rate</b> | <b>corrected mutation rate</b> |
| NC-offspring-1           | 443748566             | 5           | 5.63E-09             | 5.78E-09                       |
| NC-offspring-2           | 444163970             | 5           | 5.63E-09             | 5.77E-09                       |
| NC-offspring-3           | 443783376             | 2           | 2.25E-09             | 2.31E-09                       |
| NC-offspring-4           | 443808274             | 6           | 6.76E-09             | 6.94E-09                       |
| NC-offspring-5           | 443963800             | 0           | 0.00E+00             | 0.00E+00                       |
| NC-offspring-6           | 444012452             | 2           | 2.25E-09             | 2.31E-09                       |
| NC-offspring-7           | 443875003             | 1           | 1.13E-09             | 1.16E-09                       |
| NC-offspring-8           | 443181522             | 3           | 3.38E-09             | 3.47E-09                       |
| NC-offspring-9           | 444031968             | 3           | 3.38E-09             | 3.47E-09                       |
| NC-offspring-10          | 443443124             | 4           | 4.51E-09             | 4.63E-09                       |
| NC-offspring-11          | 444061936             | 5           | 5.63E-09             | 5.78E-09                       |
| NC-offspring-12          | 443829252             | 4           | 4.51E-09             | 4.62E-09                       |
| NC-offspring-13          | 442812216             | 8           | 9.03E-09             | 9.27E-09                       |
| NC-offspring-14          | 444066519             | 4           | 4.50E-09             | 4.62E-09                       |
| NC-offspring-15          | 443785597             | 4           | 4.51E-09             | 4.62E-09                       |
| NC-offspring-16          | 443434797             | 3           | 3.38E-09             | 3.47E-09                       |
| NC-offspring-17          | 442773346             | 3           | 3.39E-09             | 3.48E-09                       |
| NC-offspring-18          | 443710113             | 7           | 7.89E-09             | 8.09E-09                       |
| NC-offspring-19          | 443724450             | 4           | 4.51E-09             | 4.62E-09                       |
| NC-offspring-20          | 443329014             | 1           | 1.13E-09             | 1.16E-09                       |
| NC-offspring-21          | 443876552             | 5           | 5.63E-09             | 5.78E-09                       |
| NC-offspring-22          | 443271861             | 2           | 2.26E-09             | 2.31E-09                       |
| NC-offspring-23          | 444018755             | 6           | 6.76E-09             | 6.93E-09                       |
| NC-offspring-24          | 443113635             | 3           | 3.39E-09             | 3.47E-09                       |
| NC-offspring-25          | 442301971             | 1           | 1.13E-09             | 1.16E-09                       |
| NC-offspring-26          | 443732541             | 2           | 2.25E-09             | 2.31E-09                       |
| NC-offspring-27          | 443830225             | 4           | 4.51E-09             | 4.62E-09                       |
| NC-offspring-28          | 443919426             | 3           | 3.38E-09             | 3.47E-09                       |
| NC-offspring-29          | 443041592             | 3           | 3.39E-09             | 3.47E-09                       |
| NC-offspring-30          | 443863967             | 3           | 3.38E-09             | 3.47E-09                       |

| <b>Low temperature</b> |                       |             |                      |                                |
|------------------------|-----------------------|-------------|----------------------|--------------------------------|
| <b>Samples</b>         | <b>Callable sites</b> | <b>DNMs</b> | <b>Mutation rate</b> | <b>corrected mutation rate</b> |
| LT-offspring-1         | 438657304             | 5           | 5.70E-09             | 6.02E-09                       |
| LT-offspring-2         | 433907577             | 4           | 4.61E-09             | 4.87E-09                       |
| LT-offspring-3         | 424899150             | 2           | 2.35E-09             | 2.49E-09                       |
| LT-offspring-4         | 435560594             | 3           | 3.44E-09             | 3.64E-09                       |
| LT-offspring-5         | 440862582             | 4           | 4.54E-09             | 4.79E-09                       |
| LT-offspring-6         | 437625087             | 9           | 1.03E-08             | 1.09E-08                       |
| LT-offspring-7         | 440569977             | 6           | 6.81E-09             | 7.19E-09                       |
| LT-offspring-8         | 436464894             | 8           | 9.16E-09             | 9.68E-09                       |
| LT-offspring-9         | 441195970             | 3           | 3.40E-09             | 3.59E-09                       |
| LT-offspring-10        | 438426818             | 3           | 3.42E-09             | 3.61E-09                       |

| <b>High temperature</b> |                       |             |                      |                                |
|-------------------------|-----------------------|-------------|----------------------|--------------------------------|
| <b>Samples</b>          | <b>Callable sites</b> | <b>DNMs</b> | <b>Mutation rate</b> | <b>corrected mutation rate</b> |
| HT-offspring-1          | 437602698             | 3           | 3.43E-09             | 3.61E-09                       |
| HT-offspring-2          | 432212503             | 4           | 4.63E-09             | 4.87E-09                       |
| HT-offspring-3          | 432259133             | 9           | 1.04E-08             | 1.10E-08                       |
| HT-offspring-4          | 434804907             | 5           | 5.75E-09             | 6.05E-09                       |
| HT-offspring-5          | 417577791             | 3           | 3.59E-09             | 3.78E-09                       |
| HT-offspring-6          | 440852807             | 4           | 4.54E-09             | 4.78E-09                       |
| HT-offspring-7          | 437545369             | 4           | 4.57E-09             | 4.81E-09                       |
| HT-offspring-8          | 441455975             | 8           | 9.06E-09             | 9.54E-09                       |
| HT-offspring-9          | 440981010             | 2           | 2.27E-09             | 2.39E-09                       |
| HT-offspring-10         | 438417608             | 6           | 6.84E-09             | 7.21E-09                       |



**Supplementary table S6.** The callable sites, *de novo* mutations and mutation rate in gene region and intergenic regions of each genome.

| Normal condition |             |                |               |                         |                   |                |               |                         |
|------------------|-------------|----------------|---------------|-------------------------|-------------------|----------------|---------------|-------------------------|
| Samples          | Gene region |                |               |                         | Intergenic region |                |               |                         |
|                  | DNMs        | Callable sites | mutation rate | Corrected mutation rate | DNMs              | Callable sites | mutation rate | Corrected mutation rate |
| NC-offspring-1   | 2           | 159045881      | 6.29E-09      | 6.45E-09                | 3                 | 284702685      | 5.27E-09      | 5.41E-09                |
| NC-offspring-2   | 0           | 159132594      | 0.00E+00      | 0.00E+00                | 5                 | 285031376      | 8.77E-09      | 9.00E-09                |
| NC-offspring-3   | 2           | 159048414      | 6.29E-09      | 6.45E-09                | 0                 | 284734962      | 0.00E+00      | 0.00E+00                |
| NC-offspring-4   | 0           | 159046059      | 0.00E+00      | 0.00E+00                | 6                 | 284762215      | 1.05E-08      | 1.08E-08                |
| NC-offspring-5   | 0           | 159078554      | 0.00E+00      | 0.00E+00                | 0                 | 284885246      | 0.00E+00      | 0.00E+00                |
| NC-offspring-6   | 1           | 159105079      | 3.14E-09      | 3.22E-09                | 1                 | 284907373      | 1.75E-09      | 1.80E-09                |
| NC-offspring-7   | 0           | 159079636      | 0.00E+00      | 0.00E+00                | 1                 | 284795367      | 1.76E-09      | 1.80E-09                |
| NC-offspring-8   | 1           | 158934688      | 3.15E-09      | 3.23E-09                | 2                 | 284246834      | 3.52E-09      | 3.61E-09                |
| NC-offspring-9   | 0           | 159114353      | 0.00E+00      | 0.00E+00                | 3                 | 284917615      | 5.26E-09      | 5.40E-09                |
| NC-offspring-10  | 2           | 158989674      | 6.29E-09      | 6.45E-09                | 2                 | 284453450      | 3.52E-09      | 3.61E-09                |
| NC-offspring-11  | 2           | 159120494      | 6.28E-09      | 6.45E-09                | 3                 | 284941442      | 5.26E-09      | 5.40E-09                |
| NC-offspring-12  | 1           | 159068964      | 3.14E-09      | 3.23E-09                | 3                 | 284760288      | 5.27E-09      | 5.40E-09                |
| NC-offspring-13  | 5           | 158821391      | 1.57E-08      | 1.62E-08                | 3                 | 283990825      | 5.28E-09      | 5.42E-09                |
| NC-offspring-14  | 2           | 159121383      | 6.28E-09      | 6.45E-09                | 2                 | 284945136      | 3.51E-09      | 3.60E-09                |
| NC-offspring-15  | 3           | 159063137      | 9.43E-09      | 9.68E-09                | 1                 | 284722460      | 1.76E-09      | 1.80E-09                |
| NC-offspring-16  | 1           | 158866158      | 3.15E-09      | 3.23E-09                | 2                 | 284568639      | 3.51E-09      | 3.61E-09                |
| NC-offspring-17  | 1           | 158643557      | 3.15E-09      | 3.23E-09                | 2                 | 284129789      | 3.52E-09      | 3.61E-09                |
| NC-offspring-18  | 2           | 158978312      | 6.29E-09      | 6.45E-09                | 5                 | 284731801      | 8.78E-09      | 9.01E-09                |
| NC-offspring-19  | 0           | 158989264      | 0.00E+00      | 0.00E+00                | 4                 | 284735186      | 7.02E-09      | 7.21E-09                |
| NC-offspring-20  | 0           | 158829931      | 0.00E+00      | 0.00E+00                | 1                 | 284499083      | 1.76E-09      | 1.80E-09                |
| NC-offspring-21  | 2           | 159033742      | 6.29E-09      | 6.45E-09                | 3                 | 284842810      | 5.27E-09      | 5.40E-09                |
| NC-offspring-22  | 2           | 158811220      | 6.30E-09      | 6.46E-09                | 0                 | 284460641      | 0.00E+00      | 0.00E+00                |
| NC-offspring-23  | 4           | 159081674      | 1.26E-08      | 1.29E-08                | 2                 | 284937081      | 3.51E-09      | 3.60E-09                |
| NC-offspring-24  | 1           | 158752340      | 3.15E-09      | 3.23E-09                | 2                 | 284361295      | 3.52E-09      | 3.61E-09                |
| NC-offspring-25  | 0           | 158436319      | 0.00E+00      | 0.00E+00                | 1                 | 283865652      | 1.76E-09      | 1.81E-09                |
| NC-offspring-26  | 1           | 158980824      | 3.15E-09      | 3.23E-09                | 1                 | 284751717      | 1.76E-09      | 1.80E-09                |
| NC-offspring-27  | 1           | 159021187      | 3.14E-09      | 3.23E-09                | 3                 | 284809038      | 5.27E-09      | 5.40E-09                |
| NC-offspring-28  | 2           | 159053369      | 6.29E-09      | 6.45E-09                | 1                 | 284866057      | 1.76E-09      | 1.80E-09                |
| NC-offspring-29  | 2           | 158735819      | 6.30E-09      | 6.46E-09                | 1                 | 284305773      | 1.76E-09      | 1.80E-09                |
| NC-offspring-30  | 2           | 159031623      | 6.29E-09      | 6.45E-09                | 1                 | 284832344      | 1.76E-09      | 1.80E-09                |

Supplementary table S6 continue

| High temperature |             |                |               |                         |                   |                |               |                         |
|------------------|-------------|----------------|---------------|-------------------------|-------------------|----------------|---------------|-------------------------|
| Samples          | Gene region |                |               |                         | Intergenic region |                |               |                         |
|                  | DNMs        | Callable sites | Mutation rate | Corrected mutation rate | DNMs              | Callable sites | Mutation rate | Corrected mutation rate |
| HT-offspring-1   | 2           | 156396731      | 6.39E-09      | 6.56E-09                | 1                 | 281205967      | 1.78E-09      | 1.82E-09                |
| HT-offspring-2   | 0           | 154725845      | 0.00E+00      | 0.00E+00                | 4                 | 277486658      | 7.21E-09      | 7.39E-09                |
| HT-offspring-3   | 3           | 154612026      | 9.70E-09      | 9.95E-09                | 6                 | 277647107      | 1.08E-08      | 1.11E-08                |
| HT-offspring-4   | 2           | 155458074      | 6.43E-09      | 6.60E-09                | 3                 | 279346833      | 5.37E-09      | 5.51E-09                |
| HT-offspring-5   | 2           | 149686949      | 6.68E-09      | 6.85E-09                | 1                 | 267890842      | 1.87E-09      | 1.91E-09                |
| HT-offspring-6   | 2           | 157960066      | 6.33E-09      | 6.50E-09                | 2                 | 282892741      | 3.53E-09      | 3.63E-09                |
| HT-offspring-7   | 1           | 156968771      | 3.19E-09      | 3.27E-09                | 3                 | 280576598      | 5.35E-09      | 5.49E-09                |
| HT-offspring-8   | 3           | 158111213      | 9.49E-09      | 9.73E-09                | 5                 | 283344762      | 8.82E-09      | 9.05E-09                |
| HT-offspring-9   | 0           | 157969221      | 0.00E+00      | 0.00E+00                | 2                 | 283011789      | 3.53E-09      | 3.63E-09                |
| HT-offspring-10  | 0           | 157192671      | 0.00E+00      | 0.00E+00                | 6                 | 281224937      | 1.07E-08      | 1.09E-08                |

| Low temperature |             |                |               |                         |                   |                |               |                         |
|-----------------|-------------|----------------|---------------|-------------------------|-------------------|----------------|---------------|-------------------------|
| Samples         | Gene region |                |               |                         | Intergenic region |                |               |                         |
|                 | DNMs        | Callable sites | Mutation rate | Corrected mutation rate | DNMs              | Callable sites | Mutation rate | Corrected mutation rate |
| LT-offspring-1  | 2           | 156764126      | 6.38E-09      | 6.54E-09                | 3                 | 281893178      | 5.32E-09      | 5.46E-09                |
| LT-offspring-2  | 2           | 155122214      | 6.45E-09      | 6.61E-09                | 2                 | 278785363      | 3.59E-09      | 3.68E-09                |
| LT-offspring-3  | 1           | 152302751      | 3.28E-09      | 3.37E-09                | 1                 | 272596399      | 1.83E-09      | 1.88E-09                |
| LT-offspring-4  | 1           | 155687414      | 3.21E-09      | 3.30E-09                | 2                 | 279873180      | 3.57E-09      | 3.67E-09                |
| LT-offspring-5  | 1           | 157606647      | 3.17E-09      | 3.25E-09                | 3                 | 283255935      | 5.30E-09      | 5.43E-09                |
| LT-offspring-6  | 2           | 157034368      | 6.37E-09      | 6.53E-09                | 7                 | 280590719      | 1.25E-08      | 1.28E-08                |
| LT-offspring-7  | 2           | 157898935      | 6.33E-09      | 6.50E-09                | 4                 | 282671042      | 7.08E-09      | 7.26E-09                |
| LT-offspring-8  | 2           | 156641725      | 6.38E-09      | 6.55E-09                | 6                 | 279823169      | 1.07E-08      | 1.10E-08                |
| LT-offspring-9  | 1           | 158122658      | 3.16E-09      | 3.24E-09                | 2                 | 283073312      | 3.53E-09      | 3.62E-09                |
| LT-offspring-10 | 1           | 157272803      | 3.18E-09      | 3.26E-09                | 2                 | 281154015      | 3.56E-09      | 3.65E-09                |
